# Supplementary material for: Ternary supramolecular nanocomplexes for superior anticancer efficacy of natural medicines
Source: Royal Society of Chemistry journal article supplement (doi:10.1039/d1nr02791c), 2021-01-01
Supplement: d1nr02791c1.pdf [file d1nr02791c1.pdf]

## Supporting Information

### Ternary supramolecular nanocomplexes for superior anticancer efficacy of natural medicine

**Supplementary Figure S1.** Primary physiochemical properties of E@TSN. (a) Size and (b) zeta potential of E@TSN. *In vitro* release file of E@TSN in (c) pH 1.2 0.1 mol/L HCl solution medium and (d) pH 7.8 PBS release medium in 72 h (n=3).

**Supplementary Figure S2.** Proliferation of SCLC H446 cells when treated with BSN, EA and E@TSN (equivalent to 10  $\mu$ M EA) for (a) 48 h and (b) 72 h.

**Supplementary Table S1.** Coded levels and “real” values for each factor under study.

**Supplementary Table S2.** Results of orthogonal design (n = 3).

**Supplementary Table S3.** Primer sets for PCR were listed.

**Supplementary Table S3.** Mathematical models of mean cumulative release rate versus time of E@TSN and EA.

**Supplementary Table S4.** Similarity factor ( $f_2$ ) values of E@TSN and EA in four release media.

**Supplementary Table S6.** Gene ontology enrichment between E@TSN group and control group (component ontology) ( $P < 0.05$ ).

**Supplementary Table S7.** Gene ontology enrichment between E@TSN group and control group (function ontology) ( $P < 0.05$ ).

**Supplementary Table S8.** Gene ontology enrichment between E@TSN group and control group (process ontology) ( $P < 0.05$ ).

**Supplementary Table S9.** Gene ontology enrichment between EA group and Control group (component ontology) ( $P < 0.05$ ).

**Supplementary Table S10.** Gene ontology enrichment between EA group and Control group (function ontology) ( $P < 0.05$ ).

**Supplementary Table S11.** Gene ontology enrichment between EA group and Control group (process ontology) ( $P < 0.05$ ).

**Supplementary Table S12.** Gene ontology enrichment between BSN group and Control group (component ontology) ( $P < 0.05$ ).

**Supplementary Table S13.** Gene ontology enrichment between BSN group and Control group (function ontology) ( $P < 0.05$ ).

**Supplementary Table S14.** Gene ontology enrichment between BSN group and Control group (process ontology) ( $P < 0.05$ ).

**Supplementary Table S15.** Kyoto encyclopedia of genes and genomes enrichment between E@TSN group and Control group ( $P < 0.05$ ).

**Supplementary Table S16.** Kyoto encyclopedia of genes and genomes enrichment

between EA group and Control group ( $P<0.05$ ).

**Supplementary Table S17.** Kyoto encyclopedia of genes and genomes enrichment between BSN group and Control group ( $P<0.05$ ).

**Supplementary Table S18.** Blood index of mice in Control group, BSN group, EA group and E@TSN group.

**Supplementary Table S19.** Biochemical indicator of mice in Control group, BSN group, EA group and E@TSN group.

## **Supplementary Methods**

**Solubility and oil-water partition coefficient assay.**

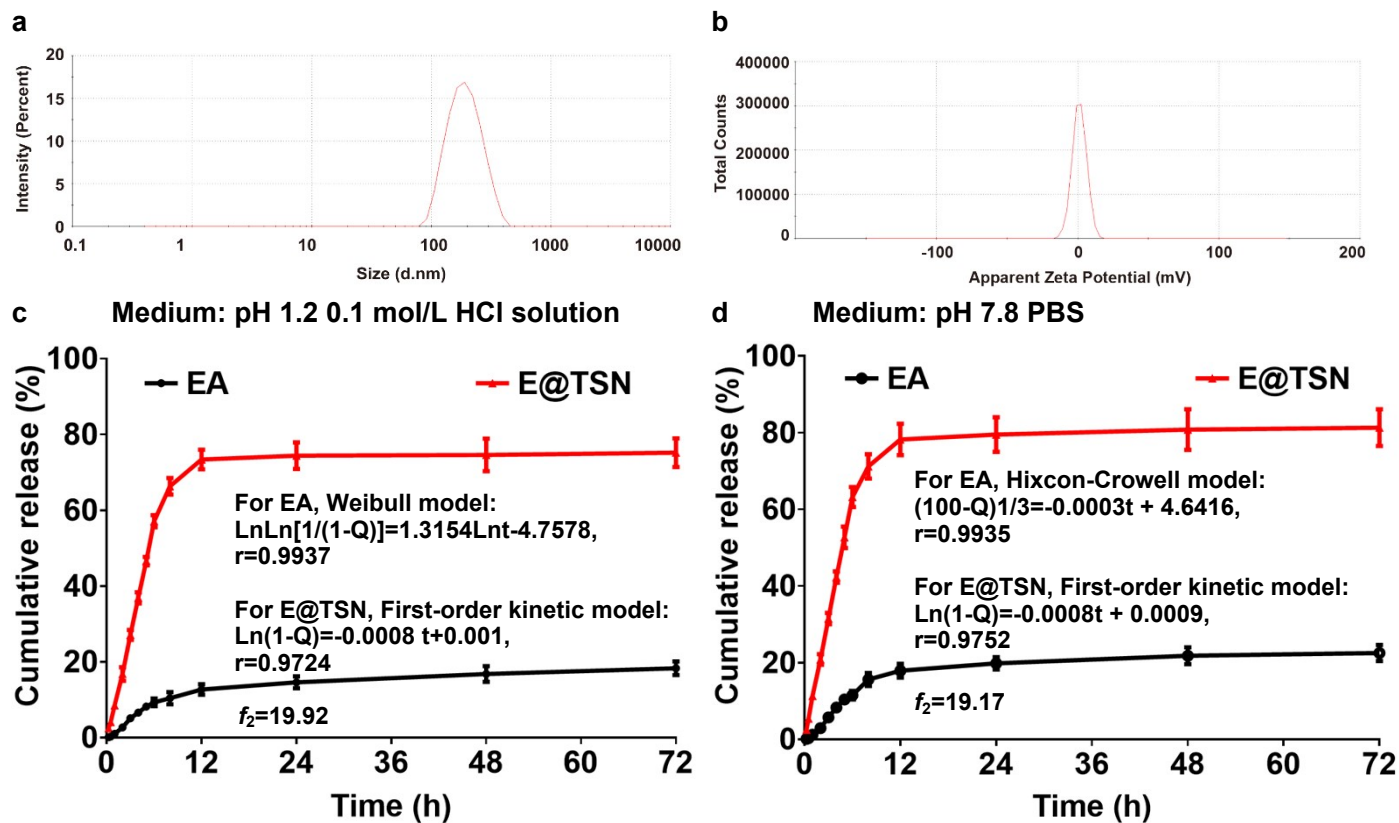

**Supplementary Figure S1.** Primary physiochemical properties of E@TSN. (a) Size and (b) zeta potential of E@TSN. *In vitro* release file of E@TSN in (c) pH 1.2 0.1 mol/L HCl solution medium and (d) pH 7.8 PBS release medium in 72 h (n=3).

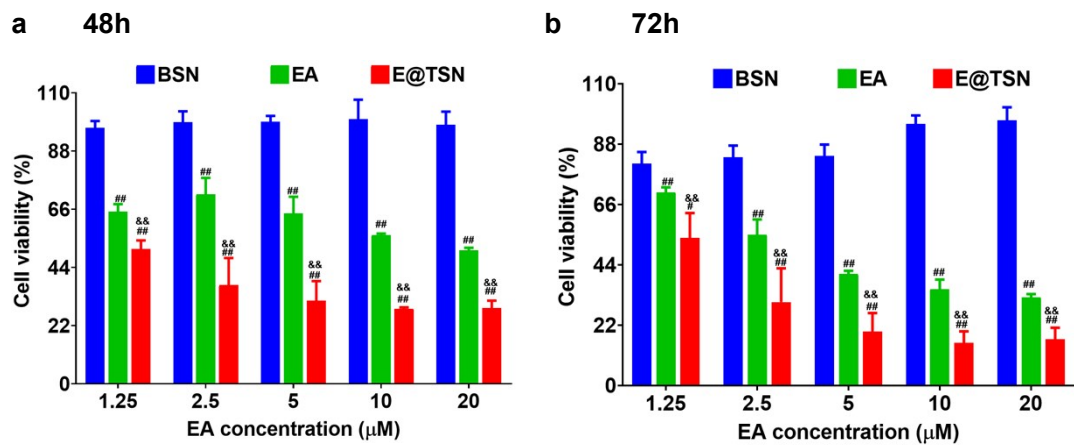

**Supplementary Figure S2.** Proliferation of SCLC H446 cells when treated with BSN, EA and E@TSN (equivalent to 10  $\mu\text{M}$  EA) for (a) 48 h and (b) 72 h.

**Supplementary Table S1.** Coded levels and “real” values for each factor under study.

| Factors             | Levels |      |      |      |       |
|---------------------|--------|------|------|------|-------|
|                     | -1.732 | -1   | 0    | 1    | 1.732 |
| X1 (EA, mol)        | 1      | 1.85 | 3    | 4.15 | 5     |
| X2 (PL/EA, mol:mol) | 0.5    | 1.03 | 1.75 | 2.47 | 3     |
| X3 (HCD/PL mol:mol) | 0.5    | 0.93 | 1.5  | 2.07 | 2.5   |

| <b>Supplementary Table S2. Results of orthogonal design (n = 3).</b> |                 |                        |                         |                                  |                               |
|----------------------------------------------------------------------|-----------------|------------------------|-------------------------|----------------------------------|-------------------------------|
| Batches                                                              | X1<br>(EA, mol) | X2<br>(PL/EA, mol:mol) | X3<br>(HCD/PL, mol:mol) | Experimental<br>complex rate (%) | Estimated<br>complex rate (%) |
| 1                                                                    | 4.15            | 2.47                   | 0.93                    | 27.82 ± 1.78                     | 33.18                         |
| 2                                                                    | 4.15            | 2.47                   | 2.07                    | 31.51 ± 3.64                     | 34.93                         |
| 3                                                                    | 4.15            | 1.03                   | 0.93                    | 32.22 ± 0.89                     | 29.45                         |
| 4                                                                    | 1.01            | 1.75                   | 1.50                    | 75.36 ± 0.97                     | 86.86                         |
| 5                                                                    | 3.00            | 1.75                   | 2.49                    | 53.35 ± 0.47                     | 53.74                         |
| 6                                                                    | 3.00            | 0.50                   | 1.50                    | 47.28 ± 1.66                     | 48.98                         |
| 7                                                                    | 1.85            | 2.47                   | 0.93                    | 85.25 ± 0.75                     | 73.23                         |
| 8                                                                    | 4.15            | 1.03                   | 2.07                    | 28.23 ± 0.70                     | 31.21                         |
| 9                                                                    | 1.85            | 1.03                   | 0.93                    | 83.44 ± 1.03                     | 69.50                         |
| 10                                                                   | 1.85            | 2.47                   | 2.07                    | 85.80 ± 0.63                     | 74.98                         |
| 11                                                                   | 3.00            | 1.75                   | 0.51                    | 40.40 ± 3.38                     | 50.69                         |
| 12                                                                   | 1.85            | 1.03                   | 2.07                    | 73.00 ± 2.51                     | 71.25                         |
| 13                                                                   | 3.00            | 3.00                   | 1.50                    | 54.57 ± 2.16                     | 55.45                         |
| 14                                                                   | 4.99            | 1.75                   | 1.50                    | 33.53 ± 0.72                     | 17.57                         |
| 15-20                                                                | 3.00            | 1.75                   | 1.50                    | 48.76 ± 1.61                     | 52.22                         |

**Supplementary Table S3.** Primer sets for PCR were listed.

| Gene  | Primer sequences                                                                       | Amplification size (bp) | Annealing temperature (°C) |
|-------|----------------------------------------------------------------------------------------|-------------------------|----------------------------|
| CD133 | Forward:<br>5¢-TTGCAACAACATCAGAATGTCT-3¢<br>Reverse:<br>5¢-ACATCAAGCCCAGGTAATAAAA -3¢  | 428                     | 61                         |
| CD44  | Forward:<br>5¢-TATTTGTGCTGCAAACCATACA -3¢<br>Reverse:<br>5¢-CACATCCAATTATTTTGCTCCT -3¢ | 401                     | 55                         |
| ABCG2 | Forward:<br>5¢-GTTGTGATGGGCACTCTGAC-3¢<br>Reverse:<br>5¢-CCCTGTTAATCCGTTTCGTTT-3¢      | 106                     | 55                         |

| Supplementary Table S4. Mathematical models of mean cumulative release rate versus time of E@TSN and EA. |                                                              |                                                              |                                                            |                                                              |                                                              |                                                              |                                                              |                                                              |
|----------------------------------------------------------------------------------------------------------|--------------------------------------------------------------|--------------------------------------------------------------|------------------------------------------------------------|--------------------------------------------------------------|--------------------------------------------------------------|--------------------------------------------------------------|--------------------------------------------------------------|--------------------------------------------------------------|
| Model                                                                                                    | E@TSN                                                        |                                                              |                                                            |                                                              | EA                                                           |                                                              |                                                              |                                                              |
|                                                                                                          | 0.1 mol/L HCl                                                | pH 6.8 PBS                                                   | pH 7.4 PBS                                                 | pH 7.8 PBS                                                   | 0.1 mol/L HCl                                                | pH 6.8 PBS                                                   | pH 7.4 PBS                                                   | pH 7.8 PBS                                                   |
| Zero-order kinetic                                                                                       | Q=0.0779t<br>-0.0994,<br>r=0.9723                            | Q=0.0914t<br>-0.0649,<br>r=0.9775                            | Q=0.0887t<br>-0.0872,<br>r=0.9815                          | Q=0.0823t<br>-0.0858,<br>r=0.9751                            | Q=0.0126t<br>+0.0052,<br>r=0.9834                            | Q=0.0233t<br>-0.0017,<br>r=0.9905                            | Q=0.0213t<br>-0.0051,<br>r=0.9923                            | Q=0.0179t+<br>0.0009,<br>r=0.9904                            |
| First-order kinetic                                                                                      | Ln(1-Q)=<br>-0.0008t<br>+0.001,<br>r=0.9724                  | Ln(1-Q)=<br>-0.0009t<br>+0.0007,<br>r=0.9777                 | Ln(1-Q)=<br>-0.0009t<br>+0.0009,<br>r=0.9816               | Ln(1-Q)=<br>-0.0008t+<br>0.0009,<br>r=0.9752                 | Ln(1-Q)=<br>-0.0136t-<br>0.0041,<br>r=0.9854                 | Ln(1-Q)=<br>-0.0268t<br>0.0069,<br>r=0.9928                  | Ln(1-Q)=<br>-0.0241t<br>+0.0095,<br>r=0.9920                 | Ln(1-Q)=<br>-0.0199t+<br>0.0018,<br>r=0.9915                 |
| Higuchi                                                                                                  | Q=0.209t <sup>1/2</sup><br>-0.0529,<br>r=0.8623              | Q=0.2453t <sup>1/2</sup><br>-0.0105,<br>r=0.8723             | Q=0.2386t <sup>1/2</sup><br>-0.0355,<br>r=0.8794           | Q=0.2211t <sup>1/2</sup><br>-0.0368,<br>r=0.8702             | Q=0.0509t <sup>1/2</sup><br>-0.0349,<br>r=0.9879             | Q=0.0924t <sup>1/2</sup><br>-0.0727,<br>r=0.9854             | Q=0.0838t <sup>1/2</sup><br>-0.0688,<br>r=0.9780             | Q=0.0715t <sup>1/2</sup><br>-0.0545,<br>r=0.9888             |
| Hixcon-Crowell                                                                                           | (100-Q) <sup>1/3</sup> =<br>-0.0002t<br>+6.6379,<br>r=0.7924 | (100-Q) <sup>1/3</sup> =<br>-0.0006t<br>+4.6373,<br>r=0.8094 | (100-Q) <sup>1/3</sup> =<br>-6E-6t<br>+4.6416,<br>r=0.8188 | (100-Q) <sup>1/3</sup> =<br>-0.0006t<br>+4.6382,<br>r=0.8115 | (100-Q) <sup>1/3</sup> =<br>-0.0002t<br>+4.6415,<br>r=0.9835 | (100-Q) <sup>1/3</sup> =<br>-0.0004t<br>+4.6416,<br>r=0.9928 | (100-Q) <sup>1/3</sup> =<br>-0.0003t<br>+4.6417,<br>r=0.9923 | (100-Q) <sup>1/3</sup> =<br>-0.0003t<br>+4.6416,<br>r=0.9935 |
| Ritger-peppas                                                                                            | Q=0.6268t<br>-2.5739,<br>r=0.9365                            | Q=0.8133t<br>-2.0015,<br>r=0.9296                            | Q=0.8318t<br>-2.1232,<br>r=0.9945                          | Q=0.837t<br>-2.2239,<br>r=0.9491                             | LnQ=1.2955<br>Lnt-4.771,<br>r=0.9867                         | LnQ=1.4504<br>Lnt-4.5511,<br>r=0.9884                        | LnQ=1.4222<br>Lnt-4.6481,<br>r=0.9924                        | LnQ=1.3884<br>Lnt-4.6764,<br>r=0.9901                        |
| Weibull                                                                                                  | LnLn[1/(1-<br>Q)]=0.8648<br>Lnt-6.9928,<br>r=0.9540          | LnLn[1/(1-<br>Q)]=0.8145<br>Lnt-6.6055,<br>r=0.9298          | LnLn[1/(1-<br>Q)]=0.8329<br>Lnt-6.7273,<br>r=0.9454        | LnLn[1/(1-<br>Q)]=0.8381<br>Lnt-6.8281,<br>r=0.9491          | LnLn[1/(1-<br>Q)]=1.3154<br>Lnt-4.7578,<br>r=0.9937          | LnLn[1/(1-<br>Q)]=1.4875<br>Lnt-4.5309,<br>r=0.9954          | LnLn[1/(1-<br>Q)]=1.4552<br>Lnt-4.6311,<br>r=0.9937          | LnLn[1/(1-<br>Q)]=1.4166<br>Lnt-4.6101,<br>r=0.9904          |



**Supplementary Table S5.** Similarity factor ( $f_2$ ) values of E@TSN and EA in four release media.

| Release profile 1 |                     | Release profile 2 |                     | $f_2$ | Difference |
|-------------------|---------------------|-------------------|---------------------|-------|------------|
| Formulation       | Release medium      | Formulation       | Release medium      |       |            |
| E@TSN             | pH 1.2 HCl solution | EA                | pH 1.2 HCl solution | 19.92 | Yes        |
| E@TSN             | pH 6.8 PBS          | EA                | pH 6.8 PBS          | 17.68 | Yes        |
| E@TSN             | pH 7.8 PBS          | EA                | pH 7.8 PBS          | 19.17 | Yes        |
| E@TSN             | pH 7.4 PBS          | EA                | pH 7.4 PBS          | 16.54 | Yes        |
| E@TSN             | pH 1.2 HCl solution | E@TSN             | pH 6.8 PBS          | 43.66 | Yes        |
| E@TSN             | pH 1.2 HCl solution | E@TSN             | pH 7.8 PBS          | 66.08 | No         |
| E@TSN             | pH 1.2 HCl solution | E@TSN             | pH 7.4 PBS          | 51.83 | No         |
| E@TSN             | pH 6.8 PBS          | E@TSN             | pH 7.8 PBS          | 53.00 | No         |
| E@TSN             | pH 6.8 PBS          | E@TSN             | pH 7.4 PBS          | 67.00 | No         |
| E@TSN             | pH 7.8 PBS          | E@TSN             | pH 7.4 PBS          | 59.99 | No         |
| EA                | pH 1.2 HCl solution | EA                | pH 6.8 PBS          | 60.91 | No         |
| EA                | pH 1.2 HCl solution | EA                | pH 7.8 PBS          | 75.49 | No         |
| EA                | pH 1.2 HCl solution | EA                | pH 7.4 PBS          | 66.42 | No         |
| EA                | pH 6.8 PBS          | EA                | pH 7.8 PBS          | 74.51 | No         |
| EA                | pH 6.8 PBS          | EA                | pH 7.4 PBS          | 86.57 | No         |
| EA                | pH 7.8 PBS          | EA                | pH 7.4 PBS          | 85.11 | No         |

**Supplementary Table S6.** Gene ontology enrichment between E@TSN group and control group (component ontology) ( $P < 0.05$ ).

| Gene ontology term                           | Cluster frequency    | Protein frequency of use | <i>P</i> value |
|----------------------------------------------|----------------------|--------------------------|----------------|
| Membrane-enclosed lumen                      | 97/187 genes, 51.9%  | 1342/3725 genes, 36.0%   | 4.02E-06       |
| Chaperonin-containing T-complex              | 5/187 genes, 2.7%    | 7/3725 genes, 0.2%       | 5.85E-06       |
| Ribonucleoprotein complex                    | 38/187 genes, 20.3%  | 369/3725 genes, 9.9%     | 8.32E-06       |
| Organelle lumen                              | 94/187 genes, 50.3%  | 1310/3725 genes, 35.2%   | 9.81E-06       |
| Intracellular organelle lumen                | 93/187 genes, 49.7%  | 1300/3725 genes, 34.9%   | 1.34E-05       |
| Non-membrane-bounded organelle               | 91/187 genes, 48.7%  | 1324/3725 genes, 35.5%   | 1.07E-04       |
| Intracellular non-membrane-bounded organelle | 91/187 genes, 48.7%  | 1324/3725 genes, 35.5%   | 1.07E-04       |
| Nuclear lumen                                | 75/187 genes, 40.1%  | 1041/3725 genes, 27.9%   | 1.55E-04       |
| Melanosome                                   | 11/187 genes, 5.9%   | 64/3725 genes, 1.7%      | 2.73E-04       |
| Pigment granule                              | 11/187 genes, 5.9%   | 64/3725 genes, 1.7%      | 2.73E-04       |
| Nuclear periphery                            | 9/187 genes, 4.8%    | 46/3725 genes, 1.2%      | 3.66E-04       |
| Nucleus                                      | 110/187 genes, 58.8% | 1736/3725 genes, 46.6%   | 3.90E-04       |
| Nuclear chromosome                           | 14/187 genes, 7.5%   | 101/3725 genes, 2.7%     | 4.29E-04       |
| Nuclear part                                 | 81/187 genes, 43.3%  | 1186/3725 genes, 31.8%   | 4.77E-04       |
| Cytosolic part                               | 14/187 genes, 7.5%   | 103/3725 genes, 2.8%     | 5.27E-04       |
| Macromolecular complex                       | 99/187 genes, 52.9%  | 1533/3725 genes, 41.2%   | 5.60E-04       |
| Nucleolus                                    | 49/187 genes, 26.2%  | 639/3725 genes, 17.2%    | 9.17E-04       |
| Nuclear lamina                               | 4/187 genes, 2.1%    | 10/3725 genes, 0.3%      | 1.02E-03       |
| Catalytic step 2 spliceosome                 | 11/187 genes, 5.9%   | 75/3725 genes, 2.0%      | 1.11E-03       |
| Lamin filament                               | 3/187 genes, 1.6%    | 5/3725 genes, 0.1%       | 1.16E-03       |
| Extracellular organelle                      | 3/187 genes, 1.6%    | 5/3725 genes, 0.1%       | 1.16E-03       |
| Extracellular membrane-bounded organelle     | 3/187 genes, 1.6%    | 5/3725 genes, 0.1%       | 1.16E-03       |
| Extracellular vesicular exosome              | 3/187 genes, 1.6%    | 5/3725 genes, 0.1%       | 1.16E-03       |
| Small ribosomal subunit                      | 8/187 genes, 4.3%    | 44/3725 genes, 1.2%      | 1.29E-03       |
| Nucleoplasm                                  | 46/187 genes, 24.6%  | 604/3725 genes, 16.2%    | 1.60E-03       |
| Organelle inner membrane                     | 22/187 genes, 11.8%  | 229/3725 genes, 6.1%     | 2.10E-03       |
| Fibrillar center                             | 2/187 genes, 1.1%    | 2/3725 genes, 0.1%       | 2.51E-03       |
| Ku70:Ku80 complex                            | 2/187 genes, 1.1%    | 2/3725 genes, 0.1%       | 2.51E-03       |
| Microtubule                                  | 13/187 genes, 7.0%   | 109/3725 genes, 2.9%     | 2.82E-03       |
| Chromosome                                   | 22/187 genes, 11.8%  | 235/3725 genes, 6.3%     | 2.92E-03       |

|                                                    |                      |                        |          |
|----------------------------------------------------|----------------------|------------------------|----------|
| Spliceosomal complex                               | 13/187 genes, 7.0%   | 111/3725 genes, 3.0%   | 3.31E-03 |
| Cell surface                                       | 11/187 genes, 5.9%   | 86/3725 genes, 2.3%    | 3.41E-03 |
| Cytosolic small ribosomal subunit                  | 6/187 genes, 3.2%    | 32/3725 genes, 0.9%    | 4.48E-03 |
| Eukaryotic translation initiation factor 3 complex | 4/187 genes, 2.1%    | 15/3725 genes, 0.4%    | 5.43E-03 |
| Cytosolic ribosome                                 | 8/187 genes, 4.3%    | 55/3725 genes, 1.5%    | 5.54E-03 |
| Chromosomal part                                   | 19/187 genes, 10.2%  | 203/3725 genes, 5.4%   | 5.64E-03 |
| MCM complex                                        | 3/187 genes, 1.6%    | 8/3725 genes, 0.2%     | 5.78E-03 |
| Ribosomal subunit                                  | 10/187 genes, 5.3%   | 81/3725 genes, 2.2%    | 6.68E-03 |
| Polysome                                           | 4/187 genes, 2.1%    | 16/3725 genes, 0.4%    | 6.95E-03 |
| Mitochondrial crista                               | 2/187 genes, 1.1%    | 3/3725 genes, 0.1%     | 7.27E-03 |
| Nuclear chromosome part                            | 10/187 genes, 5.3%   | 83/3725 genes, 2.2%    | 7.93E-03 |
| Organelle part                                     | 135/187 genes, 72.2% | 2377/3725 genes, 63.8% | 8.08E-03 |
| Intermediate filament cytoskeleton                 | 6/187 genes, 3.2%    | 36/3725 genes, 1.0%    | 8.16E-03 |
| Mitochondrial inner membrane                       | 19/187 genes, 10.2%  | 212/3725 genes, 5.7%   | 8.95E-03 |
| Intracellular organelle part                       | 134/187 genes, 71.7% | 2361/3725 genes, 63.4% | 8.99E-03 |
| Nuclear matrix                                     | 6/187 genes, 3.2%    | 37/3725 genes, 1.0%    | 9.34E-03 |
| Extracellular region part                          | 12/187 genes, 6.4%   | 115/3725 genes, 3.1%   | 1.17E-02 |
| PML body                                           | 4/187 genes, 2.1%    | 19/3725 genes, 0.5%    | 1.32E-02 |
| Protein-DNA complex                                | 5/187 genes, 2.7%    | 29/3725 genes, 0.8%    | 1.34E-02 |
| Pericentriolar material                            | 2/187 genes, 1.1%    | 4/3725 genes, 0.1%     | 1.41E-02 |
| Telomere cap complex                               | 2/187 genes, 1.1%    | 4/3725 genes, 0.1%     | 1.41E-02 |
| Nuclear telomere cap complex                       | 2/187 genes, 1.1%    | 4/3725 genes, 0.1%     | 1.41E-02 |
| DNA-dependent protein kinase-DNA ligase 4 complex  | 2/187 genes, 1.1%    | 4/3725 genes, 0.1%     | 1.41E-02 |
| Nonhomologous end joining complex                  | 2/187 genes, 1.1%    | 4/3725 genes, 0.1%     | 1.41E-02 |
| Proteasome accessory complex                       | 3/187 genes, 1.6%    | 11/3725 genes, 0.3%    | 1.52E-02 |
| Pronucleus                                         | 3/187 genes, 1.6%    | 11/3725 genes, 0.3%    | 1.52E-02 |
| Extracellular matrix                               | 6/187 genes, 3.2%    | 41/3725 genes, 1.1%    | 1.53E-02 |
| Mitochondrial nucleoid                             | 5/187 genes, 2.7%    | 30/3725 genes, 0.8%    | 1.55E-02 |
| Endoplasmic reticulum lumen                        | 7/187 genes, 3.7%    | 53/3725 genes, 1.4%    | 1.56E-02 |
| Nuclear body                                       | 12/187 genes, 6.4%   | 120/3725 genes, 3.2%   | 1.61E-02 |
| Cytosol                                            | 67/187 genes, 35.8%  | 1066/3725 genes, 28.6% | 1.69E-02 |
| Proteinaceous                                      | 5/187 genes, 2.7%    | 31/3725 genes, 0.8%    | 1.77E-02 |

|                               |                      |                        |          |
|-------------------------------|----------------------|------------------------|----------|
| extracellular matrix          |                      |                        |          |
| Extracellular matrix part     | 4/187 genes, 2.1%    | 21/3725 genes, 0.6%    | 1.88E-02 |
| Preribosome                   | 3/187 genes, 1.6%    | 12/3725 genes, 0.3%    | 1.96E-02 |
| Spindle pole                  | 5/187 genes, 2.7%    | 32/3725 genes, 0.9%    | 2.02E-02 |
| Mitochondrial membrane part   | 10/187 genes, 5.3%   | 97/3725 genes, 2.6%    | 2.23E-02 |
| Microtubule cytoskeleton      | 22/187 genes, 11.8%  | 281/3725 genes, 7.5%   | 2.26E-02 |
| Collagen                      | 2/187 genes, 1.1%    | 5/3725 genes, 0.1%     | 2.27E-02 |
| Nucleoid                      | 5/187 genes, 2.7%    | 33/3725 genes, 0.9%    | 2.28E-02 |
| Nuclear heterochromatin       | 3/187 genes, 1.6%    | 13/3725 genes, 0.3%    | 2.45E-02 |
| Cytoskeletal part             | 27/187 genes, 14.4%  | 368/3725 genes, 9.9%   | 2.61E-02 |
| Chromatin                     | 10/187 genes, 5.3%   | 100/3725 genes, 2.7%   | 2.70E-02 |
| Ribosome                      | 12/187 genes, 6.4%   | 129/3725 genes, 3.5%   | 2.70E-02 |
| Microtubule organizing center | 13/187 genes, 7.0%   | 146/3725 genes, 3.9%   | 3.00E-02 |
| Intermediate filament         | 4/187 genes, 2.1%    | 25/3725 genes, 0.7%    | 3.40E-02 |
| Cell                          | 186/187 genes, 99.5% | 3626/3725 genes, 97.3% | 3.63E-02 |
| Cell part                     | 186/187 genes, 99.5% | 3626/3725 genes, 97.3% | 3.63E-02 |
| Organelle envelope            | 30/187 genes, 16.0%  | 434/3725 genes, 11.7%  | 3.98E-02 |
| Envelope                      | 30/187 genes, 16.0%  | 435/3725 genes, 11.7%  | 4.09E-02 |
| Cytoskeleton                  | 34/187 genes, 18.2%  | 507/3725 genes, 13.6%  | 4.29E-02 |
| Mitochondrial membrane        | 21/187 genes, 11.2%  | 284/3725 genes, 7.6%   | 4.42E-02 |
| 90S preribosome               | 2/187 genes, 1.1%    | 7/3725 genes, 0.2%     | 4.46E-02 |
| Paraspeckles                  | 2/187 genes, 1.1%    | 7/3725 genes, 0.2%     | 4.46E-02 |
| Midbody                       | 5/187 genes, 2.7%    | 40/3725 genes, 1.1%    | 4.78E-02 |
| Intracellular part            | 182/187 genes, 97.3% | 3521/3725 genes, 94.5% | 4.95E-02 |

**Supplementary Table S7.** Gene ontology enrichment between E@TSN group and Control group (Function ontology) ( $P < 0.05$ ).

| Gene ontology term                                | Cluster frequency    | Protein frequency of use | <i>P</i> value |
|---------------------------------------------------|----------------------|--------------------------|----------------|
| Unfolded protein binding                          | 21/181 genes, 11.6%  | 72/3499 genes, 2.1%      | 2.40E-11       |
| Heterocyclic compound binding                     | 114/181 genes, 63.0% | 1513/3499 genes, 43.2%   | 3.25E-08       |
| Organic cyclic compound binding                   | 114/181 genes, 63.0% | 1519/3499 genes, 43.4%   | 4.25E-08       |
| Small molecule binding                            | 79/181 genes, 43.6%  | 954/3499 genes, 27.3%    | 8.30E-07       |
| Nucleotide binding                                | 76/181 genes, 42.0%  | 920/3499 genes, 26.3%    | 1.79E-06       |
| Nucleoside phosphate binding                      | 76/181 genes, 42.0%  | 921/3499 genes, 26.3%    | 1.88E-06       |
| Nucleic acid binding                              | 69/181 genes, 38.1%  | 824/3499 genes, 23.5%    | 4.66E-06       |
| RNA binding                                       | 46/181 genes, 25.4%  | 472/3499 genes, 13.5%    | 7.29E-06       |
| Adenyl nucleotide binding                         | 49/181 genes, 27.1%  | 524/3499 genes, 15.0%    | 1.09E-05       |
| ATP binding                                       | 48/181 genes, 26.5%  | 517/3499 genes, 14.8%    | 1.69E-05       |
| Purine nucleotide binding                         | 57/181 genes, 31.5%  | 659/3499 genes, 18.8%    | 1.86E-05       |
| Adenyl ribonucleotide binding                     | 48/181 genes, 26.5%  | 521/3499 genes, 14.9%    | 2.10E-05       |
| Purine ribonucleoside triphosphate binding        | 56/181 genes, 30.9%  | 651/3499 genes, 18.6%    | 2.71E-05       |
| Purine ribonucleoside binding                     | 56/181 genes, 30.9%  | 652/3499 genes, 18.6%    | 2.84E-05       |
| Purine nucleoside binding                         | 56/181 genes, 30.9%  | 653/3499 genes, 18.7%    | 2.97E-05       |
| Ribonucleoside binding                            | 56/181 genes, 30.9%  | 654/3499 genes, 18.7%    | 3.11E-05       |
| Purine ribonucleotide binding                     | 56/181 genes, 30.9%  | 654/3499 genes, 18.7%    | 3.11E-05       |
| Nucleoside binding                                | 56/181 genes, 30.9%  | 657/3499 genes, 18.8%    | 3.58E-05       |
| Ribonucleotide binding                            | 56/181 genes, 30.9%  | 659/3499 genes, 18.8%    | 3.92E-05       |
| Translation factor activity, nucleic acid binding | 13/181 genes, 7.2%   | 73/3499 genes, 2.1%      | 6.91E-05       |
| Anion binding                                     | 65/181 genes, 35.9%  | 823/3499 genes, 23.5%    | 7.74E-05       |
| Helicase activity                                 | 12/181 genes, 6.6%   | 68/3499 genes, 1.9%      | 1.45E-04       |
| Atpase activity                                   | 19/181 genes, 10.5%  | 165/3499 genes, 4.7%     | 6.95E-04       |
| ATP-dependent helicase activity                   | 10/181 genes, 5.5%   | 60/3499 genes, 1.7%      | 8.42E-04       |
| Purine NTP-dependent helicase activity            | 10/181 genes, 5.5%   | 60/3499 genes, 1.7%      | 8.42E-04       |
| Cell surface binding                              | 4/181 genes, 2.2%    | 10/3499 genes, 0.3%      | 1.14E-03       |
| Pyrophosphatase activity                          | 30/181 genes, 16.6%  | 331/3499 genes, 9.5%     | 1.34E-03       |
| Hydrolase activity, acting on acid anhydrides     | 30/181 genes, 16.6%  | 331/3499 genes, 9.5%     | 1.34E-03       |
| Hydrolase activity, acting on acid anhydrides, in | 30/181 genes, 16.6%  | 331/3499 genes, 9.5%     | 1.34E-03       |

|                                                         |                      |                        |          |
|---------------------------------------------------------|----------------------|------------------------|----------|
| phosphorus-containing anhydrides                        |                      |                        |          |
| Nucleoside-triphosphatase activity                      | 29/181 genes, 16.0%  | 323/3499 genes, 9.2%   | 1.89E-03 |
| Atpase activity, coupled                                | 15/181 genes, 8.3%   | 128/3499 genes, 3.7%   | 2.16E-03 |
| Chaperone binding                                       | 6/181 genes, 3.3%    | 28/3499 genes, 0.8%    | 2.56E-03 |
| Fructose-bisphosphate aldolase activity                 | 2/181 genes, 1.1%    | 2/3499 genes, 0.1%     | 2.66E-03 |
| Lactate dehydrogenase activity                          | 2/181 genes, 1.1%    | 2/3499 genes, 0.1%     | 2.66E-03 |
| L-lactate dehydrogenase activity                        | 2/181 genes, 1.1%    | 2/3499 genes, 0.1%     | 2.66E-03 |
| Phosphotransferase activity, carboxyl group as acceptor | 2/181 genes, 1.1%    | 2/3499 genes, 0.1%     | 2.66E-03 |
| Purine deoxyribonucleotide binding                      | 2/181 genes, 1.1%    | 2/3499 genes, 0.1%     | 2.66E-03 |
| Adenyl deoxyribonucleotide binding                      | 2/181 genes, 1.1%    | 2/3499 genes, 0.1%     | 2.66E-03 |
| Datp binding                                            | 2/181 genes, 1.1%    | 2/3499 genes, 0.1%     | 2.66E-03 |
| 5'-deoxyribose-5-phosphate lyase activity               | 2/181 genes, 1.1%    | 2/3499 genes, 0.1%     | 2.66E-03 |
| Binding                                                 | 171/181 genes, 94.5% | 3085/3499 genes, 88.2% | 2.67E-03 |
| Telomeric DNA binding                                   | 3/181 genes, 1.7%    | 7/3499 genes, 0.2%     | 4.08E-03 |
| Trna binding                                            | 5/181 genes, 2.8%    | 22/3499 genes, 0.6%    | 4.49E-03 |
| DNA helicase activity                                   | 5/181 genes, 2.8%    | 22/3499 genes, 0.6%    | 4.49E-03 |
| Translation elongation factor activity                  | 5/181 genes, 2.8%    | 22/3499 genes, 0.6%    | 4.49E-03 |
| Carboxylic acid binding                                 | 9/181 genes, 5.0%    | 63/3499 genes, 1.8%    | 4.56E-03 |
| Single-stranded DNA binding                             | 7/181 genes, 3.9%    | 43/3499 genes, 1.2%    | 5.83E-03 |
| Translation initiation factor activity                  | 7/181 genes, 3.9%    | 43/3499 genes, 1.2%    | 5.83E-03 |
| Structure-specific DNA binding                          | 10/181 genes, 5.5%   | 78/3499 genes, 2.2%    | 6.25E-03 |
| Double-stranded telomeric DNA binding                   | 2/181 genes, 1.1%    | 3/3499 genes, 0.1%     | 7.71E-03 |
| Deoxyribonucleotide binding                             | 2/181 genes, 1.1%    | 3/3499 genes, 0.1%     | 7.71E-03 |
| Carbohydrate binding                                    | 8/181 genes, 4.4%    | 61/3499 genes, 1.7%    | 1.23E-02 |
| Nitric-oxide synthase regulator activity                | 2/181 genes, 1.1%    | 4/3499 genes, 0.1%     | 1.49E-02 |

|                                     |                   |                     |          |
|-------------------------------------|-------------------|---------------------|----------|
| TPR domain binding                  | 2/181 genes, 1.1% | 4/3499 genes, 0.1%  | 1.49E-02 |
| Eukaryotic cell surface binding     | 2/181 genes, 1.1% | 4/3499 genes, 0.1%  | 1.49E-02 |
| Receptor tyrosine kinase binding    | 3/181 genes, 1.7% | 11/3499 genes, 0.3% | 1.65E-02 |
| ATP-dependent DNA helicase activity | 4/181 genes, 2.2% | 20/3499 genes, 0.6% | 1.75E-02 |
| Rrna binding                        | 4/181 genes, 2.2% | 20/3499 genes, 0.6% | 1.75E-02 |
| NAD binding                         | 6/181 genes, 3.3% | 41/3499 genes, 1.2% | 1.75E-02 |
| Monosaccharide binding              | 5/181 genes, 2.8% | 32/3499 genes, 0.9% | 2.26E-02 |
| Phospholipase inhibitor activity    | 2/181 genes, 1.1% | 5/3499 genes, 0.1%  | 2.40E-02 |
| Lipase inhibitor activity           | 2/181 genes, 1.1% | 5/3499 genes, 0.1%  | 2.40E-02 |
| Aminoacyl-trna editing activity     | 2/181 genes, 1.1% | 6/3499 genes, 0.2%  | 3.48E-02 |
| Hsp70 protein binding               | 2/181 genes, 1.1% | 6/3499 genes, 0.2%  | 3.48E-02 |
| ADP binding                         | 3/181 genes, 1.7% | 15/3499 genes, 0.4% | 3.91E-02 |
| Protein binding, bridging           | 5/181 genes, 2.8% | 37/3499 genes, 1.1% | 3.98E-02 |
| Mrna binding                        | 7/181 genes, 3.9% | 63/3499 genes, 1.8% | 4.22E-02 |
| Carbon-oxygen lyase activity        | 4/181 genes, 2.2% | 26/3499 genes, 0.7% | 4.24E-02 |
| Structural constituent of ribosome  | 9/181 genes, 5.0% | 92/3499 genes, 2.6% | 4.64E-02 |
| Solute: cation symporter activity   | 2/181 genes, 1.1% | 7/3499 genes, 0.2%  | 4.71E-02 |
| Aldehyde-lyase activity             | 2/181 genes, 1.1% | 7/3499 genes, 0.2%  | 4.71E-02 |
| Binding, bridging                   | 5/181 genes, 2.8% | 39/3499 genes, 1.1% | 4.84E-02 |

**Supplementary Table S8.** Gene ontology enrichment between E@TSN group and Control group (process ontology) ( $P < 0.05$ ).

| Gene ontology term                               | Cluster frequency    | Protein frequency of use | <i>P</i> value |
|--------------------------------------------------|----------------------|--------------------------|----------------|
| Protein folding                                  | 24/183 genes, 13.1%  | 127/3521 genes, 3.6%     | 1.59E-08       |
| Response to unfolded protein                     | 14/183 genes, 7.7%   | 62/3521 genes, 1.8%      | 2.06E-06       |
| Response to topologically incorrect protein      | 14/183 genes, 7.7%   | 65/3521 genes, 1.8%      | 3.77E-06       |
| Heterocycle metabolic process                    | 89/183 genes, 48.6%  | 1173/3521 genes, 33.3%   | 7.58E-06       |
| Nucleobase-containing compound metabolic process | 86/183 genes, 47.0%  | 1122/3521 genes, 31.9%   | 8.23E-06       |
| 'De novo' protein folding                        | 11/183 genes, 6.0%   | 45/3521 genes, 1.3%      | 1.19E-05       |
| Organic cyclic compound metabolic process        | 91/183 genes, 49.7%  | 1231/3521 genes, 35.0%   | 1.77E-05       |
| 'De novo' posttranslational protein folding      | 10/183 genes, 5.5%   | 40/3521 genes, 1.1%      | 2.44E-05       |
| Translational elongation                         | 13/183 genes, 7.1%   | 68/3521 genes, 1.9%      | 3.33E-05       |
| Chaperone-mediated protein complex assembly      | 4/183 genes, 2.2%    | 5/3521 genes, 0.1%       | 3.39E-05       |
| Cellular aromatic compound metabolic process     | 86/183 genes, 47.0%  | 1164/3521 genes, 33.1%   | 4.05E-05       |
| Cellular metabolic process                       | 139/183 genes, 76.0% | 2211/3521 genes, 62.8%   | 6.96E-05       |
| Primary metabolic process                        | 138/183 genes, 75.4% | 2199/3521 genes, 62.5%   | 9.32E-05       |
| Cellular nitrogen compound metabolic process     | 90/183 genes, 49.2%  | 1263/3521 genes, 35.9%   | 1.03E-04       |
| Organic substance metabolic process              | 140/183 genes, 76.5% | 2249/3521 genes, 63.9%   | 1.18E-04       |
| Cellular macromolecule metabolic process         | 104/183 genes, 56.8% | 1528/3521 genes, 43.4%   | 1.21E-04       |
| Chaperone-mediated protein folding               | 7/183 genes, 3.8%    | 26/3521 genes, 0.7%      | 2.59E-04       |
| Translational initiation                         | 12/183 genes, 6.6%   | 72/3521 genes, 2.0%      | 2.67E-04       |
| Macromolecule metabolic process                  | 108/183 genes, 59.0% | 1641/3521 genes, 46.6%   | 3.64E-04       |
| Nucleic acid metabolic process                   | 63/183 genes, 34.4%  | 829/3521 genes, 23.5%    | 4.07E-04       |
| Protein refolding                                | 4/183 genes, 2.2%    | 9/3521 genes, 0.3%       | 7.24E-04       |
| Nitrogen compound metabolic process              | 91/183 genes, 49.7%  | 1346/3521 genes, 38.2%   | 7.57E-04       |
| Metabolic process                                | 144/183 genes, 78.7% | 2413/3521 genes, 68.5%   | 1.16E-03       |
| Cellular protein metabolic process               | 66/183 genes, 36.1%  | 923/3521 genes, 26.2%    | 1.62E-03       |
| Gene expression                                  | 54/183 genes, 29.5%  | 722/3521 genes, 20.5%    | 1.90E-03       |
| Ribosome biogenesis                              | 13/183 genes, 7.1%   | 102/3521 genes, 2.9%     | 2.09E-03       |



|                                                                                 |                     |                        |          |
|---------------------------------------------------------------------------------|---------------------|------------------------|----------|
| Viral infectious cycle                                                          | 10/183 genes, 5.5%  | 68/3521 genes, 1.9%    | 2.35E-03 |
| Regulation of deoxyribonuclease activity                                        | 2/183 genes, 1.1%   | 2/3521 genes, 0.1%     | 2.69E-03 |
| Viral reproduction                                                              | 27/183 genes, 14.8% | 300/3521 genes, 8.5%   | 2.84E-03 |
| Nuclear-transcribed mrna catabolic process, nonsense-mediated decay             | 10/183 genes, 5.5%  | 70/3521 genes, 2.0%    | 2.92E-03 |
| Multi-organism cellular process                                                 | 27/183 genes, 14.8% | 301/3521 genes, 8.5%   | 2.98E-03 |
| Mrna metabolic process                                                          | 32/183 genes, 17.5% | 379/3521 genes, 10.8%  | 3.22E-03 |
| Translational termination                                                       | 8/183 genes, 4.4%   | 49/3521 genes, 1.4%    | 3.29E-03 |
| Viral genome expression                                                         | 8/183 genes, 4.4%   | 49/3521 genes, 1.4%    | 3.29E-03 |
| Viral transcription                                                             | 8/183 genes, 4.4%   | 49/3521 genes, 1.4%    | 3.29E-03 |
| Viral reproductive process                                                      | 22/183 genes, 12.0% | 230/3521 genes, 6.5%   | 3.39E-03 |
| Translation                                                                     | 20/183 genes, 10.9% | 204/3521 genes, 5.8%   | 3.91E-03 |
| Protein metabolic process                                                       | 70/183 genes, 38.3% | 1025/3521 genes, 29.1% | 3.95E-03 |
| Chaperone mediated protein folding requiring cofactor                           | 3/183 genes, 1.6%   | 7/3521 genes, 0.2%     | 4.14E-03 |
| NAD metabolic process                                                           | 4/183 genes, 2.2%   | 14/3521 genes, 0.4%    | 4.69E-03 |
| Ribosome assembly                                                               | 4/183 genes, 2.2%   | 14/3521 genes, 0.4%    | 4.69E-03 |
| Cellular component biogenesis                                                   | 41/183 genes, 22.4% | 536/3521 genes, 15.2%  | 5.22E-03 |
| Endoplasmic reticulum unfolded protein response                                 | 7/183 genes, 3.8%   | 42/3521 genes, 1.2%    | 5.24E-03 |
| Cellular response to unfolded protein                                           | 7/183 genes, 3.8%   | 42/3521 genes, 1.2%    | 5.24E-03 |
| Protein complex disassembly                                                     | 8/183 genes, 4.4%   | 54/3521 genes, 1.5%    | 6.07E-03 |
| Cellular protein complex disassembly                                            | 8/183 genes, 4.4%   | 54/3521 genes, 1.5%    | 6.07E-03 |
| Macromolecular complex subunit organization                                     | 36/183 genes, 19.7% | 459/3521 genes, 13.0%  | 6.10E-03 |
| Negative regulation of intracellular steroid hormone receptor signaling pathway | 3/183 genes, 1.6%   | 8/3521 genes, 0.2%     | 6.37E-03 |
| Glycolysis                                                                      | 5/183 genes, 2.7%   | 24/3521 genes, 0.7%    | 6.80E-03 |
| ER-nucleus signaling pathway                                                    | 7/183 genes, 3.8%   | 44/3521 genes, 1.2%    | 6.81E-03 |
| Cellular response to topologically incorrect protein                            | 7/183 genes, 3.8%   | 44/3521 genes, 1.2%    | 6.81E-03 |
| Multi-organism reproductive process                                             | 23/183 genes, 12.6% | 259/3521 genes, 7.4%   | 6.94E-03 |
| Nucleobase-containing compound biosynthetic process                             | 27/183 genes, 14.8% | 322/3521 genes, 9.1%   | 7.56E-03 |

|                                                                        |                      |                        |          |
|------------------------------------------------------------------------|----------------------|------------------------|----------|
| Morphogenesis of a polarized epithelium                                | 2/183 genes, 1.1%    | 3/3521 genes, 0.1%     | 7.79E-03 |
| Lactate metabolic process                                              | 2/183 genes, 1.1%    | 3/3521 genes, 0.1%     | 7.79E-03 |
| Convergent extension                                                   | 2/183 genes, 1.1%    | 3/3521 genes, 0.1%     | 7.79E-03 |
| Macromolecular complex disassembly                                     | 9/183 genes, 4.9%    | 68/3521 genes, 1.9%    | 7.83E-03 |
| Generation of precursor metabolites and energy                         | 18/183 genes, 9.8%   | 188/3521 genes, 5.3%   | 7.84E-03 |
| Regulation of intracellular steroid hormone receptor signaling pathway | 4/183 genes, 2.2%    | 16/3521 genes, 0.5%    | 7.85E-03 |
| Cellular process                                                       | 172/183 genes, 94.0% | 3118/3521 genes, 88.6% | 8.24E-03 |
| Glucose catabolic process                                              | 6/183 genes, 3.3%    | 35/3521 genes, 1.0%    | 8.35E-03 |
| Cellular response to stress                                            | 30/183 genes, 16.4%  | 374/3521 genes, 10.6%  | 9.16E-03 |
| Protein export from nucleus                                            | 3/183 genes, 1.6%    | 9/3521 genes, 0.3%     | 9.19E-03 |
| RNA metabolic process                                                  | 46/183 genes, 25.1%  | 638/3521 genes, 18.1%  | 9.27E-03 |
| Response to stress                                                     | 51/183 genes, 27.9%  | 724/3521 genes, 20.6%  | 9.39E-03 |
| Regulation of nuclease activity                                        | 6/183 genes, 3.3%    | 37/3521 genes, 1.1%    | 1.10E-02 |
| DNA metabolic process                                                  | 21/183 genes, 11.5%  | 239/3521 genes, 6.8%   | 1.10E-02 |
| Protein maturation                                                     | 5/183 genes, 2.7%    | 27/3521 genes, 0.8%    | 1.14E-02 |
| Cellular macromolecular complex assembly                               | 17/183 genes, 9.3%   | 181/3521 genes, 5.1%   | 1.16E-02 |
| Posttranscriptional regulation of gene expression                      | 15/183 genes, 8.2%   | 153/3521 genes, 4.3%   | 1.21E-02 |
| Response to endoplasmic reticulum stress                               | 7/183 genes, 3.8%    | 49/3521 genes, 1.4%    | 1.23E-02 |
| Glucose metabolic process                                              | 9/183 genes, 4.9%    | 73/3521 genes, 2.1%    | 1.23E-02 |
| DNA conformation change                                                | 8/183 genes, 4.4%    | 61/3521 genes, 1.7%    | 1.26E-02 |
| Protein complex subunit organization                                   | 28/183 genes, 15.3%  | 353/3521 genes, 10.0%  | 1.36E-02 |
| Nucleotide metabolic process                                           | 25/183 genes, 13.7%  | 307/3521 genes, 8.7%   | 1.44E-02 |
| Nucleoside phosphate metabolic process                                 | 25/183 genes, 13.7%  | 308/3521 genes, 8.7%   | 1.50E-02 |
| Fructose 1,6-bisphosphate metabolic process                            | 2/183 genes, 1.1%    | 4/3521 genes, 0.1%     | 1.50E-02 |
| Chaperone cofactor-dependent protein refolding                         | 2/183 genes, 1.1%    | 4/3521 genes, 0.1%     | 1.50E-02 |
| Heterocycle biosynthetic process                                       | 28/183 genes, 15.3%  | 356/3521 genes, 10.1%  | 1.52E-02 |
| DNA replication initiation                                             | 3/183 genes, 1.6%    | 11/3521 genes, 0.3%    | 1.67E-02 |
| Ribonucleoprotein complex biogenesis                                   | 15/183 genes, 8.2%   | 160/3521 genes, 4.5%   | 1.77E-02 |

|                                                        |                     |                       |          |
|--------------------------------------------------------|---------------------|-----------------------|----------|
| Pyridine nucleotide metabolic process                  | 5/183 genes, 2.7%   | 30/3521 genes, 0.9%   | 1.77E-02 |
| Monosaccharide biosynthetic process                    | 5/183 genes, 2.7%   | 30/3521 genes, 0.9%   | 1.77E-02 |
| Nicotinamide nucleotide metabolic process              | 5/183 genes, 2.7%   | 30/3521 genes, 0.9%   | 1.77E-02 |
| Hexose catabolic process                               | 6/183 genes, 3.3%   | 41/3521 genes, 1.2%   | 1.79E-02 |
| Dicarboxylic acid metabolic process                    | 6/183 genes, 3.3%   | 41/3521 genes, 1.2%   | 1.79E-02 |
| Establishment of protein localization to organelle     | 13/183 genes, 7.1%  | 132/3521 genes, 3.7%  | 1.83E-02 |
| Aromatic compound biosynthetic process                 | 27/183 genes, 14.8% | 346/3521 genes, 9.8%  | 1.88E-02 |
| Ribonucleotide metabolic process                       | 19/183 genes, 10.4% | 222/3521 genes, 6.3%  | 1.99E-02 |
| Nucleobase-containing small molecule metabolic process | 26/183 genes, 14.2% | 332/3521 genes, 9.4%  | 2.02E-02 |
| Gluconeogenesis                                        | 4/183 genes, 2.2%   | 21/3521 genes, 0.6%   | 2.11E-02 |
| Developmental growth involved in morphogenesis         | 3/183 genes, 1.6%   | 12/3521 genes, 0.3%   | 2.15E-02 |
| Nuclear-transcribed mrna catabolic process             | 11/183 genes, 6.0%  | 107/3521 genes, 3.0%  | 2.17E-02 |
| Monosaccharide catabolic process                       | 6/183 genes, 3.3%   | 43/3521 genes, 1.2%   | 2.22E-02 |
| Organelle assembly SRP-dependent                       | 6/183 genes, 3.3%   | 43/3521 genes, 1.2%   | 2.22E-02 |
| cotranslational protein targeting to membrane          | 8/183 genes, 4.4%   | 68/3521 genes, 1.9%   | 2.32E-02 |
| Ribose phosphate metabolic process                     | 19/183 genes, 10.4% | 226/3521 genes, 6.4%  | 2.35E-02 |
| Multi-organism process                                 | 31/183 genes, 16.9% | 419/3521 genes, 11.9% | 2.42E-02 |
| Axis elongation                                        | 2/183 genes, 1.1%   | 5/3521 genes, 0.1%    | 2.42E-02 |
| GMP biosynthetic process                               | 2/183 genes, 1.1%   | 5/3521 genes, 0.1%    | 2.42E-02 |
| DNA unwinding involved in replication                  | 2/183 genes, 1.1%   | 5/3521 genes, 0.1%    | 2.42E-02 |
| Outer mitochondrial membrane organization              | 2/183 genes, 1.1%   | 5/3521 genes, 0.1%    | 2.42E-02 |
| Protein maturation by protein folding                  | 2/183 genes, 1.1%   | 5/3521 genes, 0.1%    | 2.42E-02 |
| Protein import into mitochondrial outer membrane       | 2/183 genes, 1.1%   | 5/3521 genes, 0.1%    | 2.42E-02 |
| Mrna cis splicing, via spliceosome                     | 2/183 genes, 1.1%   | 5/3521 genes, 0.1%    | 2.42E-02 |

|                                                                |                     |                       |          |
|----------------------------------------------------------------|---------------------|-----------------------|----------|
| GMP metabolic process                                          | 2/183 genes, 1.1%   | 5/3521 genes, 0.1%    | 2.42E-02 |
| Regulation of translation                                      | 10/183 genes, 5.5%  | 95/3521 genes, 2.7%   | 2.42E-02 |
| Reproduction                                                   | 32/183 genes, 17.5% | 436/3521 genes, 12.4% | 2.45E-02 |
| Purine nucleotide metabolic process                            | 19/183 genes, 10.4% | 227/3521 genes, 6.4%  | 2.45E-02 |
| Cotranslational protein targeting to membrane                  | 8/183 genes, 4.4%   | 69/3521 genes, 2.0%   | 2.52E-02 |
| Protein targeting to ER                                        | 8/183 genes, 4.4%   | 69/3521 genes, 2.0%   | 2.52E-02 |
| Establishment of protein localization to endoplasmic reticulum | 8/183 genes, 4.4%   | 69/3521 genes, 2.0%   | 2.52E-02 |
| Nucleosome organization                                        | 5/183 genes, 2.7%   | 33/3521 genes, 0.9%   | 2.60E-02 |
| Reproductive process                                           | 30/183 genes, 16.4% | 405/3521 genes, 11.5% | 2.61E-02 |
| Purine ribonucleotide metabolic process                        | 18/183 genes, 9.8%  | 214/3521 genes, 6.1%  | 2.71E-02 |
| DNA packaging                                                  | 6/183 genes, 3.3%   | 45/3521 genes, 1.3%   | 2.73E-02 |
| Monosaccharide metabolic process                               | 10/183 genes, 5.5%  | 97/3521 genes, 2.8%   | 2.76E-02 |
| Mrna catabolic process                                         | 11/183 genes, 6.0%  | 111/3521 genes, 3.2%  | 2.77E-02 |
| Protein targeting to membrane                                  | 9/183 genes, 4.9%   | 84/3521 genes, 2.4%   | 2.87E-02 |
| Organic cyclic compound biosynthetic process                   | 29/183 genes, 15.8% | 392/3521 genes, 11.1% | 2.90E-02 |
| Purine nucleotide biosynthetic process                         | 7/183 genes, 3.8%   | 58/3521 genes, 1.6%   | 2.91E-02 |
| Heterocycle catabolic process                                  | 26/183 genes, 14.2% | 343/3521 genes, 9.7%  | 2.92E-02 |
| Chromatin assembly or disassembly                              | 5/183 genes, 2.7%   | 34/3521 genes, 1.0%   | 2.93E-02 |
| Positive regulation of nuclease activity                       | 5/183 genes, 2.7%   | 34/3521 genes, 1.0%   | 2.93E-02 |
| Pyridine-containing compound metabolic process                 | 5/183 genes, 2.7%   | 34/3521 genes, 1.0%   | 2.93E-02 |
| Cellular component assembly                                    | 32/183 genes, 17.5% | 443/3521 genes, 12.6% | 3.00E-02 |
| Protein localization to organelle                              | 17/183 genes, 9.3%  | 202/3521 genes, 5.7%  | 3.12E-02 |
| Cellular macromolecule biosynthetic process                    | 37/183 genes, 20.2% | 529/3521 genes, 15.0% | 3.12E-02 |
| Oxidoreduction coenzyme metabolic process                      | 5/183 genes, 2.7%   | 35/3521 genes, 1.0%   | 3.28E-02 |
| Visual perception                                              | 3/183 genes, 1.6%   | 14/3521 genes, 0.4%   | 3.29E-02 |
| DNA duplex unwinding                                           | 3/183 genes, 1.6%   | 14/3521 genes, 0.4%   | 3.29E-02 |
| Ribosomal small subunit biogenesis                             | 3/183 genes, 1.6%   | 14/3521 genes, 0.4%   | 3.29E-02 |

|                                                          |                     |                        |          |
|----------------------------------------------------------|---------------------|------------------------|----------|
| Sensory perception of light stimulus                     | 3/183 genes, 1.6%   | 14/3521 genes, 0.4%    | 3.29E-02 |
| DNA strand elongation involved in DNA replication        | 4/183 genes, 2.2%   | 24/3521 genes, 0.7%    | 3.32E-02 |
| Nucleosome assembly                                      | 4/183 genes, 2.2%   | 24/3521 genes, 0.7%    | 3.32E-02 |
| Hexose biosynthetic process                              | 4/183 genes, 2.2%   | 24/3521 genes, 0.7%    | 3.32E-02 |
| DNA strand elongation                                    | 4/183 genes, 2.2%   | 24/3521 genes, 0.7%    | 3.32E-02 |
| Intracellular steroid hormone receptor signaling pathway | 4/183 genes, 2.2%   | 24/3521 genes, 0.7%    | 3.32E-02 |
| Cellular component organization or biogenesis            | 77/183 genes, 42.1% | 1248/3521 genes, 35.4% | 3.34E-02 |
| Mitochondrial transport                                  | 8/183 genes, 4.4%   | 73/3521 genes, 2.1%    | 3.40E-02 |
| Macromolecular complex assembly                          | 26/183 genes, 14.2% | 348/3521 genes, 9.9%   | 3.43E-02 |
| Ribonucleoside triphosphate metabolic process            | 16/183 genes, 8.7%  | 189/3521 genes, 5.4%   | 3.44E-02 |
| Interaction with host                                    | 16/183 genes, 8.7%  | 189/3521 genes, 5.4%   | 3.44E-02 |
| Non-recombinational repair                               | 2/183 genes, 1.1%   | 6/3521 genes, 0.2%     | 3.51E-02 |
| Fructose metabolic process                               | 2/183 genes, 1.1%   | 6/3521 genes, 0.2%     | 3.51E-02 |
| Double-strand break repair via nonhomologous end joining | 2/183 genes, 1.1%   | 6/3521 genes, 0.2%     | 3.51E-02 |
| DNA replication-independent nucleosome assembly          | 2/183 genes, 1.1%   | 6/3521 genes, 0.2%     | 3.51E-02 |
| Dosage compensation                                      | 2/183 genes, 1.1%   | 6/3521 genes, 0.2%     | 3.51E-02 |
| Mitochondrial fusion                                     | 2/183 genes, 1.1%   | 6/3521 genes, 0.2%     | 3.51E-02 |
| Regulation of centrosome duplication                     | 2/183 genes, 1.1%   | 6/3521 genes, 0.2%     | 3.51E-02 |
| Protein sumoylation                                      | 2/183 genes, 1.1%   | 6/3521 genes, 0.2%     | 3.51E-02 |
| 4-hydroxyproline metabolic process                       | 2/183 genes, 1.1%   | 6/3521 genes, 0.2%     | 3.51E-02 |
| CENP-A containing nucleosome assembly at centromere      | 2/183 genes, 1.1%   | 6/3521 genes, 0.2%     | 3.51E-02 |
| DNA replication-independent nucleosome organization      | 2/183 genes, 1.1%   | 6/3521 genes, 0.2%     | 3.51E-02 |
| Branching involved in mammary gland duct morphogenesis   | 2/183 genes, 1.1%   | 6/3521 genes, 0.2%     | 3.51E-02 |
| Mammary gland duct morphogenesis                         | 2/183 genes, 1.1%   | 6/3521 genes, 0.2%     | 3.51E-02 |
| DNA biosynthetic process                                 | 2/183 genes, 1.1%   | 6/3521 genes, 0.2%     | 3.51E-02 |
| Establishment of epithelial cell polarity                | 2/183 genes, 1.1%   | 6/3521 genes, 0.2%     | 3.51E-02 |

|                                                                                    |                     |                       |          |
|------------------------------------------------------------------------------------|---------------------|-----------------------|----------|
| Negative regulation of cellular macromolecule biosynthetic process                 | 18/183 genes, 9.8%  | 221/3521 genes, 6.3%  | 3.59E-02 |
| Intracellular receptor mediated signaling pathway                                  | 6/183 genes, 3.3%   | 48/3521 genes, 1.4%   | 3.62E-02 |
| Nucleoside metabolic process                                                       | 19/183 genes, 10.4% | 237/3521 genes, 6.7%  | 3.63E-02 |
| Cellular nitrogen compound biosynthetic process                                    | 28/183 genes, 15.3% | 383/3521 genes, 10.9% | 3.64E-02 |
| Protein localization to endoplasmic reticulum                                      | 8/183 genes, 4.4%   | 74/3521 genes, 2.1%   | 3.64E-02 |
| Virus-host interaction                                                             | 15/183 genes, 8.2%  | 176/3521 genes, 5.0%  | 3.79E-02 |
| Chromatin assembly                                                                 | 4/183 genes, 2.2%   | 25/3521 genes, 0.7%   | 3.79E-02 |
| Negative regulation of sequence-specific DNA binding transcription factor activity | 4/183 genes, 2.2%   | 25/3521 genes, 0.7%   | 3.79E-02 |
| Organic cyclic compound catabolic process                                          | 26/183 genes, 14.2% | 352/3521 genes, 10.0% | 3.87E-02 |
| Symbiosis, encompassing mutualism through parasitism                               | 16/183 genes, 8.7%  | 192/3521 genes, 5.5%  | 3.90E-02 |
| Interspecies interaction between organisms                                         | 16/183 genes, 8.7%  | 192/3521 genes, 5.5%  | 3.90E-02 |
| DNA geometric change                                                               | 3/183 genes, 1.6%   | 15/3521 genes, 0.4%   | 3.96E-02 |
| RNA catabolic process                                                              | 11/183 genes, 6.0%  | 118/3521 genes, 3.4%  | 4.10E-02 |
| Negative regulation of transcription, DNA-dependent                                | 15/183 genes, 8.2%  | 178/3521 genes, 5.1%  | 4.13E-02 |
| Regulation of biosynthetic process                                                 | 46/183 genes, 25.1% | 697/3521 genes, 19.8% | 4.13E-02 |
| RNA processing                                                                     | 27/183 genes, 14.8% | 371/3521 genes, 10.5% | 4.17E-02 |
| Purine-containing compound metabolic process                                       | 19/183 genes, 10.4% | 241/3521 genes, 6.8%  | 4.20E-02 |
| Organic substance biosynthetic process                                             | 55/183 genes, 30.1% | 858/3521 genes, 24.4% | 4.21E-02 |
| Hexose metabolic process                                                           | 9/183 genes, 4.9%   | 90/3521 genes, 2.6%   | 4.23E-02 |
| Mitochondrial membrane organization                                                | 4/183 genes, 2.2%   | 26/3521 genes, 0.7%   | 4.31E-02 |
| Ribonucleotide biosynthetic process                                                | 7/183 genes, 3.8%   | 63/3521 genes, 1.8%   | 4.31E-02 |
| Ribonucleoside metabolic process                                                   | 18/183 genes, 9.8%  | 226/3521 genes, 6.4%  | 4.34E-02 |
| Protein-DNA complex subunit organization                                           | 5/183 genes, 2.7%   | 38/3521 genes, 1.1%   | 4.47E-02 |

|                                                                                        |                     |                       |          |
|----------------------------------------------------------------------------------------|---------------------|-----------------------|----------|
| Glycosyl compound metabolic process                                                    | 19/183 genes, 10.4% | 243/3521 genes, 6.9%  | 4.52E-02 |
| Macromolecule biosynthetic process                                                     | 37/183 genes, 20.2% | 544/3521 genes, 15.5% | 4.54E-02 |
| Nucleoside triphosphate metabolic process                                              | 16/183 genes, 8.7%  | 196/3521 genes, 5.6%  | 4.58E-02 |
| Chromatin remodeling at centromere                                                     | 2/183 genes, 1.1%   | 7/3521 genes, 0.2%    | 4.75E-02 |
| Histone exchange Establishment or maintenance of epithelial cell apical/basal polarity | 2/183 genes, 1.1%   | 7/3521 genes, 0.2%    | 4.75E-02 |
| Mitochondrion localization                                                             | 2/183 genes, 1.1%   | 7/3521 genes, 0.2%    | 4.75E-02 |
| Mammary gland morphogenesis                                                            | 2/183 genes, 1.1%   | 7/3521 genes, 0.2%    | 4.75E-02 |
| Negative regulation of macromolecule biosynthetic process                              | 18/183 genes, 9.8%  | 229/3521 genes, 6.5%  | 4.84E-02 |
| Protein stabilization                                                                  | 4/183 genes, 2.2%   | 27/3521 genes, 0.8%   | 4.86E-02 |
| Regulation of cellular biosynthetic process                                            | 45/183 genes, 24.6% | 687/3521 genes, 19.5% | 4.88E-02 |
| Protein targeting to mitochondrion                                                     | 5/183 genes, 2.7%   | 39/3521 genes, 1.1%   | 4.93E-02 |
| Purine ribonucleoside metabolic process                                                | 17/183 genes, 9.3%  | 214/3521 genes, 6.1%  | 4.99E-02 |
| Aromatic compound catabolic process                                                    | 25/183 genes, 13.7% | 344/3521 genes, 9.8%  | 4.99E-02 |
| Cellular nitrogen compound catabolic process                                           | 25/183 genes, 13.7% | 344/3521 genes, 9.8%  | 4.99E-02 |

**Supplementary Table S9.** Gene ontology enrichment between EA group and Control group (component ontology) ( $P < 0.05$ ).

| Gene ontology term                           | Cluster frequency   | Protein frequency of use | <i>P</i> value |
|----------------------------------------------|---------------------|--------------------------|----------------|
| Extracellular region part                    | 15/118 genes, 12.7% | 115/3725 genes, 3.1%     | 2.22E-06       |
| Cell-cell junction                           | 12/118 genes, 10.2% | 93/3725 genes, 2.5%      | 2.77E-05       |
| Extracellular region                         | 18/118 genes, 15.3% | 199/3725 genes, 5.3%     | 3.98E-05       |
| MCM complex                                  | 4/118 genes, 3.4%   | 8/3725 genes, 0.2%       | 6.07E-05       |
| Cell junction                                | 16/118 genes, 13.6% | 182/3725 genes, 4.9%     | 1.57E-04       |
| Extracellular organelle                      | 3/118 genes, 2.5%   | 5/3725 genes, 0.1%       | 2.96E-04       |
| Extracellular membrane-bounded organelle     | 3/118 genes, 2.5%   | 5/3725 genes, 0.1%       | 2.96E-04       |
| Extracellular vesicular exosome              | 3/118 genes, 2.5%   | 5/3725 genes, 0.1%       | 2.96E-04       |
| Non-membrane-bounded organelle               | 60/118 genes, 50.8% | 1324/3725 genes, 35.5%   | 3.83E-04       |
| Intracellular non-membrane-bounded organelle | 60/118 genes, 50.8% | 1324/3725 genes, 35.5%   | 3.83E-04       |
| Condensin complex                            | 3/118 genes, 2.5%   | 6/3725 genes, 0.2%       | 5.78E-04       |
| Cell-cell adherens junction                  | 5/118 genes, 4.2%   | 24/3725 genes, 0.6%      | 7.68E-04       |
| Intermediate filament cytoskeleton           | 6/118 genes, 5.1%   | 36/3725 genes, 1.0%      | 7.96E-04       |
| Melanosome                                   | 8/118 genes, 6.8%   | 64/3725 genes, 1.7%      | 8.02E-04       |
| Pigment granule                              | 8/118 genes, 6.8%   | 64/3725 genes, 1.7%      | 8.02E-04       |
| Intermediate filament                        | 5/118 genes, 4.2%   | 25/3725 genes, 0.7%      | 9.36E-04       |
| Extracellular space                          | 9/118 genes, 7.6%   | 85/3725 genes, 2.3%      | 1.29E-03       |
| Cell surface                                 | 9/118 genes, 7.6%   | 86/3725 genes, 2.3%      | 1.40E-03       |
| Extracellular matrix                         | 6/118 genes, 5.1%   | 41/3725 genes, 1.1%      | 1.61E-03       |
| Cytoskeleton                                 | 28/118 genes, 23.7% | 507/3725 genes, 13.6%    | 1.77E-03       |



|                                    |                      |                        |          |
|------------------------------------|----------------------|------------------------|----------|
| Proteinaceous extracellular matrix | 5/118 genes, 4.2%    | 31/3725 genes, 0.8%    | 2.57E-03 |
| Cornified envelope                 | 2/118 genes, 1.7%    | 3/3725 genes, 0.1%     | 2.92E-03 |
| Anchoring junction                 | 8/118 genes, 6.8%    | 79/3725 genes, 2.1%    | 3.18E-03 |
| Desmosome                          | 3/118 genes, 2.5%    | 13/3725 genes, 0.3%    | 7.03E-03 |
| Adherens junction                  | 7/118 genes, 5.9%    | 73/3725 genes, 2.0%    | 7.73E-03 |
| Intercalated disc                  | 3/118 genes, 2.5%    | 14/3725 genes, 0.4%    | 8.74E-03 |
| Cell-cell contact zone             | 3/118 genes, 2.5%    | 14/3725 genes, 0.4%    | 8.74E-03 |
| Contractile fiber part             | 5/118 genes, 4.2%    | 41/3725 genes, 1.1%    | 8.82E-03 |
| Collagen                           | 2/118 genes, 1.7%    | 5/3725 genes, 0.1%     | 9.35E-03 |
| Intracellular part                 | 117/118 genes, 99.2% | 3521/3725 genes, 94.5% | 9.40E-03 |
| Plasma membrane                    | 31/118 genes, 26.3%  | 652/3725 genes, 17.5%  | 1.00E-02 |
| Cytoskeletal part                  | 20/118 genes, 16.9%  | 368/3725 genes, 9.9%   | 1.05E-02 |
| Cell periphery                     | 32/118 genes, 27.1%  | 682/3725 genes, 18.3%  | 1.07E-02 |
| Coated pit                         | 4/118 genes, 3.4%    | 28/3725 genes, 0.8%    | 1.09E-02 |
| Macromolecular complex             | 61/118 genes, 51.7%  | 1533/3725 genes, 41.2% | 1.21E-02 |
| Myofibril                          | 5/118 genes, 4.2%    | 45/3725 genes, 1.2%    | 1.30E-02 |
| Nucleolus                          | 30/118 genes, 25.4%  | 639/3725 genes, 17.2%  | 1.36E-02 |
| Cytosol                            | 45/118 genes, 38.1%  | 1066/3725 genes, 28.6% | 1.48E-02 |
| Cytosolic part                     | 8/118 genes, 6.8%    | 103/3725 genes, 2.8%   | 1.54E-02 |
| Contractile fiber                  | 5/118 genes, 4.2%    | 47/3725 genes, 1.3%    | 1.55E-02 |
| Chaperonin-containing complex      | 2/118 genes, 1.7%    | 7/3725 genes, 0.2%     | 1.88E-02 |
| Fascia adherens                    | 2/118 genes, 1.7%    | 7/3725 genes, 0.2%     | 1.88E-02 |

|                                      |                      |                        |          |
|--------------------------------------|----------------------|------------------------|----------|
| Microtubule                          | 8/118 genes, 6.8%    | 109/3725 genes, 2.9%   | 2.11E-02 |
| Sarcomere                            | 4/118 genes, 3.4%    | 34/3725 genes, 0.9%    | 2.13E-02 |
| Ribonucleoprotein complex            | 19/118 genes, 16.1%  | 369/3725 genes, 9.9%   | 2.15E-02 |
| Plasma membrane part                 | 17/118 genes, 14.4%  | 319/3725 genes, 8.6%   | 2.17E-02 |
| Intracellular                        | 117/118 genes, 99.2% | 3551/3725 genes, 95.3% | 2.25E-02 |
| Nucleosome                           | 2/118 genes, 1.7%    | 8/3725 genes, 0.2%     | 2.46E-02 |
| Endoplasmic reticulum lumen          | 5/118 genes, 4.2%    | 53/3725 genes, 1.4%    | 2.50E-02 |
| Extracellular matrix part            | 3/118 genes, 2.5%    | 21/3725 genes, 0.6%    | 2.72E-02 |
| Membrane-bounded vesicle             | 15/118 genes, 12.7%  | 278/3725 genes, 7.5%   | 2.77E-02 |
| Condensed chromosome                 | 6/118 genes, 5.1%    | 74/3725 genes, 2.0%    | 2.86E-02 |
| Z disc                               | 3/118 genes, 2.5%    | 22/3725 genes, 0.6%    | 3.08E-02 |
| Sarcolemma                           | 3/118 genes, 2.5%    | 22/3725 genes, 0.6%    | 3.08E-02 |
| I band                               | 3/118 genes, 2.5%    | 23/3725 genes, 0.6%    | 3.46E-02 |
| Midbody                              | 4/118 genes, 3.4%    | 40/3725 genes, 1.1%    | 3.64E-02 |
| Nuclear lamina                       | 2/118 genes, 1.7%    | 10/3725 genes, 0.3%    | 3.79E-02 |
| Plasma lipoprotein particle          | 2/118 genes, 1.7%    | 10/3725 genes, 0.3%    | 3.79E-02 |
| Costamere                            | 2/118 genes, 1.7%    | 10/3725 genes, 0.3%    | 3.79E-02 |
| Basolateral plasma membrane          | 4/118 genes, 3.4%    | 41/3725 genes, 1.1%    | 3.93E-02 |
| Cytoplasmic membrane-bounded vesicle | 14/118 genes, 11.9%  | 271/3725 genes, 7.3%   | 4.53E-02 |
| Protein-lipid complex                | 2/118 genes, 1.7%    | 11/3725 genes, 0.3%    | 4.54E-02 |
| Pronucleus                           | 2/118 genes, 1.7%    | 11/3725 genes, 0.3%    | 4.54E-02 |

**Supplementary Table S10.** Gene ontology enrichment between EA group and Control group (function ontology) ( $P < 0.05$ ).

| Gene ontology term                                                                 | Cluster frequency   | Protein frequency of use | <i>P</i> value |
|------------------------------------------------------------------------------------|---------------------|--------------------------|----------------|
| ATP binding                                                                        | 35/118 genes, 29.7% | 517/3499 genes, 14.8%    | 1.95E-05       |
| Adenyl ribonucleotide binding                                                      | 35/118 genes, 29.7% | 521/3499 genes, 14.9%    | 2.31E-05       |
| Adenyl nucleotide binding                                                          | 35/118 genes, 29.7% | 524/3499 genes, 15.0%    | 2.63E-05       |
| Purine ribonucleoside triphosphate binding                                         | 39/118 genes, 33.1% | 651/3499 genes, 18.6%    | 9.78E-05       |
| Purine ribonucleoside binding                                                      | 39/118 genes, 33.1% | 652/3499 genes, 18.6%    | 1.01E-04       |
| Purine nucleoside binding                                                          | 39/118 genes, 33.1% | 653/3499 genes, 18.7%    | 1.05E-04       |
| Ribonucleoside binding                                                             | 39/118 genes, 33.1% | 654/3499 genes, 18.7%    | 1.09E-04       |
| Purine ribonucleotide binding                                                      | 39/118 genes, 33.1% | 654/3499 genes, 18.7%    | 1.09E-04       |
| Unfolded protein binding                                                           | 10/118 genes, 8.5%  | 72/3499 genes, 2.1%      | 1.19E-04       |
| Nucleoside binding                                                                 | 39/118 genes, 33.1% | 657/3499 genes, 18.8%    | 1.20E-04       |
| Purine nucleotide binding                                                          | 39/118 genes, 33.1% | 659/3499 genes, 18.8%    | 1.29E-04       |
| Ribonucleotide binding                                                             | 39/118 genes, 33.1% | 659/3499 genes, 18.8%    | 1.29E-04       |
| Anion binding                                                                      | 45/118 genes, 38.1% | 823/3499 genes, 23.5%    | 2.13E-04       |
| ATPase activity, coupled                                                           | 13/118 genes, 11.0% | 128/3499 genes, 3.7%     | 2.99E-04       |
| ATPase activity                                                                    | 15/118 genes, 12.7% | 165/3499 genes, 4.7%     | 3.47E-04       |
| Helicase activity                                                                  | 9/118 genes, 7.6%   | 68/3499 genes, 1.9%      | 3.83E-04       |
| Small molecule binding                                                             | 49/118 genes, 41.5% | 954/3499 genes, 27.3%    | 4.65E-04       |
| ATP-dependent helicase activity                                                    | 8/118 genes, 6.8%   | 60/3499 genes, 1.7%      | 7.77E-04       |
| Purine NTP-dependent helicase activity                                             | 8/118 genes, 6.8%   | 60/3499 genes, 1.7%      | 7.77E-04       |
| Fructose-bisphosphate aldolase activity                                            | 2/118 genes, 1.7%   | 2/3499 genes, 0.1%       | 1.13E-03       |
| Phosphotransferase activity, carboxyl group as acceptor                            | 2/118 genes, 1.7%   | 2/3499 genes, 0.1%       | 1.13E-03       |
| Nucleotide binding                                                                 | 45/118 genes, 38.1% | 920/3499 genes, 26.3%    | 2.75E-03       |
| Nucleoside phosphate binding                                                       | 45/118 genes, 38.1% | 921/3499 genes, 26.3%    | 2.81E-03       |
| Single-stranded DNA binding                                                        | 6/118 genes, 5.1%   | 43/3499 genes, 1.2%      | 2.84E-03       |
| Pyrophosphatase activity                                                           | 21/118 genes, 17.8% | 331/3499 genes, 9.5%     | 2.95E-03       |
| Hydrolase activity, acting on acid anhydrides                                      | 21/118 genes, 17.8% | 331/3499 genes, 9.5%     | 2.95E-03       |
| Hydrolase activity, acting on acid anhydrides, in phosphorus-containing anhydrides | 21/118 genes, 17.8% | 331/3499 genes, 9.5%     | 2.95E-03       |
| Cell surface binding                                                               | 3/118 genes, 2.5%   | 10/3499 genes, 0.3%      | 3.77E-03       |
| Actin filament binding                                                             | 5/118 genes, 4.2%   | 32/3499 genes, 0.9%      | 3.89E-03       |
| Carbohydrate binding                                                               | 7/118 genes, 5.9%   | 61/3499 genes, 1.7%      | 4.00E-03       |
| Nucleoside-triphosphatase activity                                                 | 20/118 genes, 16.9% | 323/3499 genes, 9.2%     | 4.95E-03       |

|                                                                             |                      |                        |          |
|-----------------------------------------------------------------------------|----------------------|------------------------|----------|
| Structural constituent of cytoskeleton                                      | 5/118 genes, 4.2%    | 34/3499 genes, 1.0%    | 5.09E-03 |
| Cytoskeletal protein binding                                                | 14/118 genes, 11.9%  | 199/3499 genes, 5.7%   | 6.35E-03 |
| Nitric-oxide synthase regulator activity                                    | 2/118 genes, 1.7%    | 4/3499 genes, 0.1%     | 6.47E-03 |
| TPR domain binding                                                          | 2/118 genes, 1.7%    | 4/3499 genes, 0.1%     | 6.47E-03 |
| Xenobiotic transporter activity                                             | 2/118 genes, 1.7%    | 4/3499 genes, 0.1%     | 6.47E-03 |
| Cadherin binding                                                            | 3/118 genes, 2.5%    | 12/3499 genes, 0.3%    | 6.58E-03 |
| Structural molecule activity                                                | 14/118 genes, 11.9%  | 201/3499 genes, 5.7%   | 6.93E-03 |
| Heterocyclic compound binding                                               | 64/118 genes, 54.2%  | 1513/3499 genes, 43.2% | 9.45E-03 |
| Organic cyclic compound binding                                             | 64/118 genes, 54.2%  | 1519/3499 genes, 43.4% | 1.05E-02 |
| Phospholipase inhibitor activity                                            | 2/118 genes, 1.7%    | 5/3499 genes, 0.1%     | 1.05E-02 |
| Lipase inhibitor activity                                                   | 2/118 genes, 1.7%    | 5/3499 genes, 0.1%     | 1.05E-02 |
| ADP binding                                                                 | 3/118 genes, 2.5%    | 15/3499 genes, 0.4%    | 1.26E-02 |
| Structure-specific DNA binding                                              | 7/118 genes, 5.9%    | 78/3499 genes, 2.2%    | 1.51E-02 |
| Intramolecular oxidoreductase activity                                      | 4/118 genes, 3.4%    | 29/3499 genes, 0.8%    | 1.52E-02 |
| Actin binding                                                               | 9/118 genes, 7.6%    | 117/3499 genes, 3.3%   | 1.61E-02 |
| Aldehyde-lyase activity                                                     | 2/118 genes, 1.7%    | 7/3499 genes, 0.2%     | 2.12E-02 |
| Monosaccharide binding                                                      | 4/118 genes, 3.4%    | 32/3499 genes, 0.9%    | 2.13E-02 |
| Binding                                                                     | 111/118 genes, 94.1% | 3085/3499 genes, 88.2% | 2.34E-02 |
| Cell adhesion molecule binding                                              | 3/118 genes, 2.5%    | 19/3499 genes, 0.5%    | 2.44E-02 |
| Microfilament motor activity                                                | 2/118 genes, 1.7%    | 8/3499 genes, 0.2%     | 2.76E-02 |
| L-ascorbic acid binding                                                     | 2/118 genes, 1.7%    | 8/3499 genes, 0.2%     | 2.76E-02 |
| ATP-dependent DNA helicase activity                                         | 3/118 genes, 2.5%    | 20/3499 genes, 0.6%    | 2.80E-02 |
| Ion binding                                                                 | 57/118 genes, 48.3%  | 1378/3499 genes, 39.4% | 2.81E-02 |
| Intramolecular oxidoreductase activity, interconverting aldoses and ketoses | 2/118 genes, 1.7%    | 9/3499 genes, 0.3%     | 3.48E-02 |
| Trna binding                                                                | 3/118 genes, 2.5%    | 22/3499 genes, 0.6%    | 3.61E-02 |
| DNA helicase activity                                                       | 3/118 genes, 2.5%    | 22/3499 genes, 0.6%    | 3.61E-02 |
| Carbon-carbon lyase activity                                                | 3/118 genes, 2.5%    | 22/3499 genes, 0.6%    | 3.61E-02 |
| Calcium-dependent phospholipid binding                                      | 2/118 genes, 1.7%    | 10/3499 genes, 0.3%    | 4.25E-02 |
| Structural constituent of muscle                                            | 2/118 genes, 1.7%    | 10/3499 genes, 0.3%    | 4.25E-02 |

|                                                                               |                     |                        |          |
|-------------------------------------------------------------------------------|---------------------|------------------------|----------|
| Intramolecular oxidoreductase activity, interconverting keto- and enol-groups | 2/118 genes, 1.7%   | 10/3499 genes, 0.3%    | 4.25E-02 |
| Protein binding                                                               | 87/118 genes, 73.7% | 2312/3499 genes, 66.1% | 4.37E-02 |
| Calmodulin binding                                                            | 4/118 genes, 3.4%   | 41/3499 genes, 1.2%    | 4.77E-02 |
| Isomerase activity                                                            | 6/118 genes, 5.1%   | 79/3499 genes, 2.3%    | 4.88E-02 |

**Supplementary Table S11.** Gene ontology enrichment between EA group and Control group (process ontology) ( $P < 0.05$ ).

| Gene ontology term                                | Cluster frequency   | Protein frequency of use | <i>P</i> value |
|---------------------------------------------------|---------------------|--------------------------|----------------|
| Glycolysis                                        | 8/120 genes, 6.7%   | 24/3521 genes, 0.7%      | 6.71E-07       |
| Response to unfolded protein                      | 12/120 genes, 10.0% | 62/3521 genes, 1.8%      | 7.23E-07       |
| Response to topologically incorrect protein       | 12/120 genes, 10.0% | 65/3521 genes, 1.8%      | 1.24E-06       |
| Gluconeogenesis                                   | 7/120 genes, 5.8%   | 21/3521 genes, 0.6%      | 3.51E-06       |
| Hexose biosynthetic process                       | 7/120 genes, 5.8%   | 24/3521 genes, 0.7%      | 9.59E-06       |
| Glucose catabolic process                         | 8/120 genes, 6.7%   | 35/3521 genes, 1.0%      | 1.57E-05       |
| Protein folding                                   | 15/120 genes, 12.5% | 127/3521 genes, 3.6%     | 1.89E-05       |
| Glucose metabolic process                         | 11/120 genes, 9.2%  | 73/3521 genes, 2.1%      | 2.70E-05       |
| DNA conformation change                           | 10/120 genes, 8.3%  | 61/3521 genes, 1.7%      | 3.01E-05       |
| Monosaccharide biosynthetic process               | 7/120 genes, 5.8%   | 30/3521 genes, 0.9%      | 4.76E-05       |
| Hexose catabolic process                          | 8/120 genes, 6.7%   | 41/3521 genes, 1.2%      | 5.36E-05       |
| Monosaccharide catabolic process                  | 8/120 genes, 6.7%   | 43/3521 genes, 1.2%      | 7.68E-05       |
| Monosaccharide metabolic process                  | 12/120 genes, 10.0% | 97/3521 genes, 2.8%      | 8.66E-05       |
| Hexose metabolic process                          | 11/120 genes, 9.2%  | 90/3521 genes, 2.6%      | 1.93E-04       |
| System development                                | 38/120 genes, 31.7% | 647/3521 genes, 18.4%    | 2.51E-04       |
| DNA replication initiation                        | 4/120 genes, 3.3%   | 11/3521 genes, 0.3%      | 3.52E-04       |
| Carbohydrate biosynthetic process                 | 8/120 genes, 6.7%   | 53/3521 genes, 1.5%      | 3.53E-04       |
| DNA unwinding involved in replication             | 3/120 genes, 2.5%   | 5/3521 genes, 0.1%       | 3.67E-04       |
| Chaperone-mediated protein complex assembly       | 3/120 genes, 2.5%   | 5/3521 genes, 0.1%       | 3.67E-04       |
| Single-organism carbohydrate catabolic process    | 8/120 genes, 6.7%   | 54/3521 genes, 1.5%      | 4.03E-04       |
| Carbohydrate catabolic process                    | 8/120 genes, 6.7%   | 55/3521 genes, 1.6%      | 4.58E-04       |
| DNA packaging                                     | 7/120 genes, 5.8%   | 45/3521 genes, 1.3%      | 6.93E-04       |
| Developmental process                             | 45/120 genes, 37.5% | 863/3521 genes, 24.5%    | 8.74E-04       |
| DNA strand elongation involved in DNA replication | 5/120 genes, 4.2%   | 24/3521 genes, 0.7%      | 1.07E-03       |
| DNA strand elongation                             | 5/120 genes, 4.2%   | 24/3521 genes, 0.7%      | 1.07E-03       |
| Anatomical structure development                  | 41/120 genes, 34.2% | 769/3521 genes, 21.8%    | 1.07E-03       |

|                                                       |                     |                        |          |
|-------------------------------------------------------|---------------------|------------------------|----------|
| Regulation of deoxyribonuclease activity              | 2/120 genes, 1.7%   | 2/3521 genes, 0.1%     | 1.15E-03 |
| Mitotic chromosome condensation                       | 3/120 genes, 2.5%   | 7/3521 genes, 0.2%     | 1.22E-03 |
| Chaperone mediated protein folding requiring cofactor | 3/120 genes, 2.5%   | 7/3521 genes, 0.2%     | 1.22E-03 |
| Response to chemical stimulus                         | 39/120 genes, 32.5% | 725/3521 genes, 20.6%  | 1.26E-03 |
| Regulation of nuclease activity                       | 6/120 genes, 5.0%   | 37/3521 genes, 1.1%    | 1.35E-03 |
| Cell cycle phase transition                           | 9/120 genes, 7.5%   | 83/3521 genes, 2.4%    | 1.80E-03 |
| Mitotic cell cycle phase transition                   | 9/120 genes, 7.5%   | 83/3521 genes, 2.4%    | 1.80E-03 |
| Multicellular organismal development                  | 40/120 genes, 33.3% | 764/3521 genes, 21.7%  | 1.83E-03 |
| Response to organic substance                         | 30/120 genes, 25.0% | 522/3521 genes, 14.8%  | 2.01E-03 |
| Response to stress                                    | 38/120 genes, 31.7% | 724/3521 genes, 20.6%  | 2.40E-03 |
| Response to stimulus                                  | 63/120 genes, 52.5% | 1398/3521 genes, 39.7% | 2.63E-03 |
| Endoplasmic reticulum unfolded protein response       | 6/120 genes, 5.0%   | 42/3521 genes, 1.2%    | 2.65E-03 |
| Cellular response to unfolded protein                 | 6/120 genes, 5.0%   | 42/3521 genes, 1.2%    | 2.65E-03 |
| ER-nucleus signaling pathway                          | 6/120 genes, 5.0%   | 44/3521 genes, 1.2%    | 3.38E-03 |
| Cellular response to topologically incorrect protein  | 6/120 genes, 5.0%   | 44/3521 genes, 1.2%    | 3.38E-03 |
| Regulation of macrophage activation                   | 2/120 genes, 1.7%   | 3/3521 genes, 0.1%     | 3.38E-03 |
| Cellular response to extracellular stimulus           | 5/120 genes, 4.2%   | 31/3521 genes, 0.9%    | 3.53E-03 |
| 'De novo' protein folding                             | 6/120 genes, 5.0%   | 45/3521 genes, 1.3%    | 3.79E-03 |
| Generation of precursor metabolites and energy        | 14/120 genes, 11.7% | 188/3521 genes, 5.3%   | 4.21E-03 |
| Response to extracellular stimulus                    | 8/120 genes, 6.7%   | 78/3521 genes, 2.2%    | 4.58E-03 |
| Keratinocyte differentiation                          | 4/120 genes, 3.3%   | 21/3521 genes, 0.6%    | 4.90E-03 |
| Cellular component disassembly                        | 10/120 genes, 8.3%  | 114/3521 genes, 3.2%   | 4.94E-03 |
| Positive regulation of nuclease activity              | 5/120 genes, 4.2%   | 34/3521 genes, 1.0%    | 5.33E-03 |

|                                                |  |                      |                        |          |
|------------------------------------------------|--|----------------------|------------------------|----------|
| Response to endoplasmic reticulum stress       |  | 6/120 genes, 5.0%    | 49/3521 genes, 1.4%    | 5.83E-03 |
| Fructose 1,6-bisphosphate metabolic process    |  | 2/120 genes, 1.7%    | 4/3521 genes, 0.1%     | 6.61E-03 |
| Intermediate filament organization             |  | 2/120 genes, 1.7%    | 4/3521 genes, 0.1%     | 6.61E-03 |
| Regulation of cell aging                       |  | 2/120 genes, 1.7%    | 4/3521 genes, 0.1%     | 6.61E-03 |
| Ribosome biogenesis                            |  | 9/120 genes, 7.5%    | 102/3521 genes, 2.9%   | 7.30E-03 |
| Single-organism carbohydrate metabolic process |  | 13/120 genes, 10.8%  | 181/3521 genes, 5.1%   | 7.84E-03 |
| Epidermal cell differentiation                 |  | 4/120 genes, 3.3%    | 24/3521 genes, 0.7%    | 8.04E-03 |
| Cell differentiation                           |  | 26/120 genes, 21.7%  | 478/3521 genes, 13.6%  | 8.88E-03 |
| DNA-dependent DNA replication                  |  | 5/120 genes, 4.2%    | 39/3521 genes, 1.1%    | 9.63E-03 |
| Single-multicellular organism process          |  | 45/120 genes, 37.5%  | 972/3521 genes, 27.6%  | 1.05E-02 |
| DNA duplex unwinding                           |  | 3/120 genes, 2.5%    | 14/3521 genes, 0.4%    | 1.07E-02 |
| G1/S transition of mitotic cell cycle          |  | 5/120 genes, 4.2%    | 40/3521 genes, 1.1%    | 1.07E-02 |
| 'De novo' posttranslational protein folding    |  | 5/120 genes, 4.2%    | 40/3521 genes, 1.1%    | 1.07E-02 |
| Chaperone-mediated protein folding             |  | 4/120 genes, 3.3%    | 26/3521 genes, 0.7%    | 1.07E-02 |
| Peptide cross-linking                          |  | 2/120 genes, 1.7%    | 5/3521 genes, 0.1%     | 1.08E-02 |
| Cellular component organization or biogenesis  |  | 55/120 genes, 45.8%  | 1248/3521 genes, 35.4% | 1.09E-02 |
| Response to organic cyclic compound            |  | 11/120 genes, 9.2%   | 148/3521 genes, 4.2%   | 1.11E-02 |
| Cellular process                               |  | 114/120 genes, 95.0% | 3118/3521 genes, 88.6% | 1.14E-02 |
| Establishment or maintenance of cell polarity  |  | 5/120 genes, 4.2%    | 41/3521 genes, 1.2%    | 1.19E-02 |
| Regeneration                                   |  | 4/120 genes, 3.3%    | 27/3521 genes, 0.8%    | 1.23E-02 |
| Chromosome condensation                        |  | 3/120 genes, 2.5%    | 15/3521 genes, 0.4%    | 1.30E-02 |
| DNA geometric change                           |  | 3/120 genes, 2.5%    | 15/3521 genes, 0.4%    | 1.30E-02 |
| Single-organism developmental process          |  | 32/120 genes, 26.7%  | 644/3521 genes, 18.3%  | 1.35E-02 |
| Multicellular organismal process               |  | 46/120 genes, 38.3%  | 1013/3521 genes, 28.8% | 1.37E-02 |



|                                                                              |                     |                        |          |
|------------------------------------------------------------------------------|---------------------|------------------------|----------|
| Cellular developmental process                                               | 26/120 genes, 21.7% | 495/3521 genes, 14.1%  | 1.38E-02 |
| Cellular component disassembly involved in execution phase of apoptosis      | 5/120 genes, 4.2%   | 43/3521 genes, 1.2%    | 1.45E-02 |
| Execution phase of apoptosis                                                 | 5/120 genes, 4.2%   | 43/3521 genes, 1.2%    | 1.45E-02 |
| Extracellular matrix organization                                            | 4/120 genes, 3.3%   | 29/3521 genes, 0.8%    | 1.58E-02 |
| Extracellular structure organization                                         | 4/120 genes, 3.3%   | 29/3521 genes, 0.8%    | 1.58E-02 |
| Fructose metabolic process                                                   | 2/120 genes, 1.7%   | 6/3521 genes, 0.2%     | 1.58E-02 |
| Regulation of DNA damage response, signal transduction by p53 class mediator | 2/120 genes, 1.7%   | 6/3521 genes, 0.2%     | 1.58E-02 |
| Regulation of signal transduction by p53 class mediator                      | 2/120 genes, 1.7%   | 6/3521 genes, 0.2%     | 1.58E-02 |
| Regulation of apoptotic process                                              | 18/120 genes, 15.0% | 310/3521 genes, 8.8%   | 1.62E-02 |
| Carbohydrate metabolic process                                               | 15/120 genes, 12.5% | 243/3521 genes, 6.9%   | 1.67E-02 |
| Regulation of programmed cell death                                          | 18/120 genes, 15.0% | 314/3521 genes, 8.9%   | 1.83E-02 |
| Cellular response to organic cyclic compound                                 | 5/120 genes, 4.2%   | 46/3521 genes, 1.3%    | 1.90E-02 |
| Cellular response to external stimulus                                       | 5/120 genes, 4.2%   | 46/3521 genes, 1.3%    | 1.90E-02 |
| Ribonucleoprotein complex biogenesis                                         | 11/120 genes, 9.2%  | 160/3521 genes, 4.5%   | 1.92E-02 |
| Single-organism process                                                      | 92/120 genes, 76.7% | 2385/3521 genes, 67.7% | 1.92E-02 |
| Male sex differentiation                                                     | 4/120 genes, 3.3%   | 31/3521 genes, 0.9%    | 1.98E-02 |
| Intermediate filament-based process                                          | 2/120 genes, 1.7%   | 7/3521 genes, 0.2%     | 2.16E-02 |
| Intermediate filament cytoskeleton organization                              | 2/120 genes, 1.7%   | 7/3521 genes, 0.2%     | 2.16E-02 |
| Mitochondrion localization                                                   | 2/120 genes, 1.7%   | 7/3521 genes, 0.2%     | 2.16E-02 |
| Mitotic sister chromatid segregation                                         | 3/120 genes, 2.5%   | 18/3521 genes, 0.5%    | 2.17E-02 |
| Regulation of protein secretion                                              | 3/120 genes, 2.5%   | 18/3521 genes, 0.5%    | 2.17E-02 |

|                                                                                |                     |                        |          |
|--------------------------------------------------------------------------------|---------------------|------------------------|----------|
| Activation of signaling protein activity involved in unfolded protein response | 4/120 genes, 3.3%   | 32/3521 genes, 0.9%    | 2.21E-02 |
| Negative regulation of neuron apoptotic process                                | 4/120 genes, 3.3%   | 32/3521 genes, 0.9%    | 2.21E-02 |
| Negative regulation of neuron death                                            | 4/120 genes, 3.3%   | 32/3521 genes, 0.9%    | 2.21E-02 |
| Response to external stimulus                                                  | 14/120 genes, 11.7% | 230/3521 genes, 6.5%   | 2.30E-02 |
| Viral reproductive process                                                     | 14/120 genes, 11.7% | 230/3521 genes, 6.5%   | 2.30E-02 |
| Epidermis development                                                          | 5/120 genes, 4.2%   | 49/3521 genes, 1.4%    | 2.44E-02 |
| Regulation of cell death                                                       | 18/120 genes, 15.0% | 324/3521 genes, 9.2%   | 2.44E-02 |
| Nucleosome organization                                                        | 4/120 genes, 3.3%   | 33/3521 genes, 0.9%    | 2.45E-02 |
| Nervous system development                                                     | 19/120 genes, 15.8% | 349/3521 genes, 9.9%   | 2.53E-02 |
| Cellular response to stress                                                    | 20/120 genes, 16.7% | 374/3521 genes, 10.6%  | 2.59E-02 |
| Chromatin assembly or disassembly                                              | 4/120 genes, 3.3%   | 34/3521 genes, 1.0%    | 2.70E-02 |
| ATP catabolic process                                                          | 6/120 genes, 5.0%   | 68/3521 genes, 1.9%    | 2.70E-02 |
| Translational elongation                                                       | 6/120 genes, 5.0%   | 68/3521 genes, 1.9%    | 2.70E-02 |
| Organic anion transport                                                        | 5/120 genes, 4.2%   | 51/3521 genes, 1.4%    | 2.84E-02 |
| Sister chromatid segregation                                                   | 3/120 genes, 2.5%   | 20/3521 genes, 0.6%    | 2.88E-02 |
| ATP metabolic process                                                          | 7/120 genes, 5.8%   | 88/3521 genes, 2.5%    | 2.91E-02 |
| Rhythmic process                                                               | 4/120 genes, 3.3%   | 35/3521 genes, 1.0%    | 2.97E-02 |
| Small molecule metabolic process                                               | 39/120 genes, 32.5% | 870/3521 genes, 24.7%  | 3.09E-02 |
| Response to inorganic substance                                                | 8/120 genes, 6.7%   | 109/3521 genes, 3.1%   | 3.10E-02 |
| Negative regulation of apoptotic process                                       | 8/120 genes, 6.7%   | 109/3521 genes, 3.1%   | 3.10E-02 |
| Primary metabolic process                                                      | 85/120 genes, 70.8% | 2199/3521 genes, 62.5% | 3.19E-02 |
| Cellular aldehyde metabolic process                                            | 3/120 genes, 2.5%   | 21/3521 genes, 0.6%    | 3.28E-02 |
| Cellular response to starvation                                                | 3/120 genes, 2.5%   | 21/3521 genes, 0.6%    | 3.28E-02 |
| Epithelial cell differentiation                                                | 5/120 genes, 4.2%   | 53/3521 genes, 1.5%    | 3.29E-02 |
| Single-organism behavior                                                       | 5/120 genes, 4.2%   | 53/3521 genes, 1.5%    | 3.29E-02 |
| Cellular component organization                                                | 50/120 genes, 41.7% | 1178/3521 genes, 33.5% | 3.43E-02 |
| Response to nutrient levels                                                    | 6/120 genes, 5.0%   | 72/3521 genes, 2.0%    | 3.46E-02 |
| Neurogenesis                                                                   | 14/120 genes, 11.7% | 243/3521 genes, 6.9%   | 3.49E-02 |

|                                              |                     |                        |          |
|----------------------------------------------|---------------------|------------------------|----------|
| Sister chromatid cohesion                    | 2/120 genes, 1.7%   | 9/3521 genes, 0.3%     | 3.55E-02 |
| Purine nucleobase biosynthetic process       | 2/120 genes, 1.7%   | 9/3521 genes, 0.3%     | 3.55E-02 |
| Protein refolding                            | 2/120 genes, 1.7%   | 9/3521 genes, 0.3%     | 3.55E-02 |
| Ribosomal large subunit biogenesis           | 2/120 genes, 1.7%   | 9/3521 genes, 0.3%     | 3.55E-02 |
| Negative regulation of programmed cell death | 8/120 genes, 6.7%   | 112/3521 genes, 3.2%   | 3.56E-02 |
| Ribonucleotide metabolic process             | 13/120 genes, 10.8% | 222/3521 genes, 6.3%   | 3.70E-02 |
| Sensory perception of sound                  | 3/120 genes, 2.5%   | 22/3521 genes, 0.6%    | 3.71E-02 |
| Cell communication                           | 37/120 genes, 30.8% | 828/3521 genes, 23.5%  | 3.77E-02 |
| Protein-DNA complex subunit organization     | 4/120 genes, 3.3%   | 38/3521 genes, 1.1%    | 3.88E-02 |
| Ovulation cycle process                      | 3/120 genes, 2.5%   | 23/3521 genes, 0.7%    | 4.16E-02 |
| Ovulation cycle                              | 3/120 genes, 2.5%   | 23/3521 genes, 0.7%    | 4.16E-02 |
| Organic substance metabolic process          | 86/120 genes, 71.7% | 2249/3521 genes, 63.9% | 4.17E-02 |
| Ribose phosphate metabolic process           | 13/120 genes, 10.8% | 226/3521 genes, 6.4%   | 4.19E-02 |
| Gonad development                            | 4/120 genes, 3.3%   | 39/3521 genes, 1.1%    | 4.21E-02 |
| Response to cadmium ion                      | 2/120 genes, 1.7%   | 10/3521 genes, 0.3%    | 4.33E-02 |
| Neuromuscular process controlling balance    | 2/120 genes, 1.7%   | 10/3521 genes, 0.3%    | 4.33E-02 |
| Organ development                            | 21/120 genes, 17.5% | 421/3521 genes, 12.0%  | 4.42E-02 |
| Nucleosome assembly                          | 3/120 genes, 2.5%   | 24/3521 genes, 0.7%    | 4.64E-02 |
| Sensory perception of mechanical stimulus    | 3/120 genes, 2.5%   | 24/3521 genes, 0.7%    | 4.64E-02 |
| Cell death                                   | 14/120 genes, 11.7% | 254/3521 genes, 7.2%   | 4.80E-02 |
| Death                                        | 14/120 genes, 11.7% | 254/3521 genes, 7.2%   | 4.80E-02 |
| Apoptotic process                            | 12/120 genes, 10.0% | 208/3521 genes, 5.9%   | 4.88E-02 |
| Dicarboxylic acid metabolic process          | 4/120 genes, 3.3%   | 41/3521 genes, 1.2%    | 4.92E-02 |
| Single-organism cellular process             | 84/120 genes, 70.0% | 2200/3521 genes, 62.5% | 4.95E-02 |

**Supplementary Table S12.** Gene ontology enrichment between BSN group and Control group (component ontology) ( $P < 0.05$ ).

| Gene ontology term                           | Cluster frequency   | Protein frequency of use | <i>P</i> value |
|----------------------------------------------|---------------------|--------------------------|----------------|
| Extracellular organelle                      | 2/29 genes, 6.9%    | 5/3725 genes, 0.1%       | 5.77E-04       |
| Extracellular membrane-bounded organelle     | 2/29 genes, 6.9%    | 5/3725 genes, 0.1%       | 5.77E-04       |
| Extracellular vesicular exosome              | 2/29 genes, 6.9%    | 5/3725 genes, 0.1%       | 5.77E-04       |
| Cytoplasm                                    | 29/29 genes, 100.0% | 2929/3725 genes, 78.6%   | 9.10E-04       |
| Melanosome                                   | 4/29 genes, 13.8%   | 64/3725 genes, 1.7%      | 1.36E-03       |
| Pigment granule                              | 4/29 genes, 13.8%   | 64/3725 genes, 1.7%      | 1.36E-03       |
| Macromolecular complex                       | 20/29 genes, 69.0%  | 1533/3725 genes, 41.2%   | 2.22E-03       |
| Nuclear chromosome part                      | 4/29 genes, 13.8%   | 83/3725 genes, 2.2%      | 3.56E-03       |
| Cell surface                                 | 4/29 genes, 13.8%   | 86/3725 genes, 2.3%      | 4.05E-03       |
| Nuclear replication fork                     | 2/29 genes, 6.9%    | 16/3725 genes, 0.4%      | 6.56E-03       |
| Nuclear chromosome                           | 4/29 genes, 13.8%   | 101/3725 genes, 2.7%     | 7.18E-03       |
| Protein complex                              | 16/29 genes, 55.2%  | 1219/3725 genes, 32.7%   | 1.02E-02       |
| Extracellular region part                    | 4/29 genes, 13.8%   | 115/3725 genes, 3.1%     | 1.13E-02       |
| Nucleolus                                    | 10/29 genes, 34.5%  | 639/3725 genes, 17.2%    | 1.83E-02       |
| Chromosomal part                             | 5/29 genes, 17.2%   | 203/3725 genes, 5.4%     | 1.86E-02       |
| Replication fork                             | 2/29 genes, 6.9%    | 28/3725 genes, 0.8%      | 1.95E-02       |
| Coated pit                                   | 2/29 genes, 6.9%    | 28/3725 genes, 0.8%      | 1.95E-02       |
| Ribonucleoprotein complex                    | 7/29 genes, 24.1%   | 369/3725 genes, 9.9%     | 2.02E-02       |
| Cell projection                              | 6/29 genes, 20.7%   | 295/3725 genes, 7.9%     | 2.35E-02       |
| Non-membrane-bounded organelle               | 16/29 genes, 55.2%  | 1324/3725 genes, 35.5%   | 2.36E-02       |
| Intracellular non-membrane-bounded organelle | 16/29 genes, 55.2%  | 1324/3725 genes, 35.5%   | 2.36E-02       |
| Chromosome                                   | 5/29 genes, 17.2%   | 235/3725 genes, 6.3%     | 3.27E-02       |
| Cytoskeleton                                 | 8/29 genes, 27.6%   | 507/3725 genes, 13.6%    | 3.51E-02       |
| Cell projection membrane                     | 2/29 genes, 6.9%    | 42/3725 genes, 1.1%      | 4.16E-02       |
| Cytosol                                      | 13/29 genes, 44.8%  | 1066/3725 genes, 28.6%   | 4.55E-02       |
| Nuclear periphery                            | 2/29 genes, 6.9%    | 46/3725 genes, 1.2%      | 4.90E-02       |

**Supplementary Table S13.** Gene ontology enrichment between BSN group and Control group (function ontology) ( $P < 0.05$ ).

| Gene ontology term                                                                                    | Cluster frequency  | Protein frequency of use | <i>P</i> value |
|-------------------------------------------------------------------------------------------------------|--------------------|--------------------------|----------------|
| Unfolded protein binding                                                                              | 4/28 genes, 14.3%  | 72/3499 genes, 2.1%      | 2.32E-03       |
| Ion channel binding                                                                                   | 2/28 genes, 7.1%   | 13/3499 genes, 0.4%      | 4.56E-03       |
| Translation elongation factor activity                                                                | 2/28 genes, 7.1%   | 22/3499 genes, 0.6%      | 1.29E-02       |
| Translation factor activity, nucleic acid binding                                                     | 3/28 genes, 10.7%  | 73/3499 genes, 2.1%      | 1.96E-02       |
| Heterocyclic compound binding                                                                         | 18/28 genes, 64.3% | 1513/3499 genes, 43.2%   | 1.98E-02       |
| Chaperone binding                                                                                     | 2/28 genes, 7.1%   | 28/3499 genes, 0.8%      | 2.05E-02       |
| Organic cyclic compound binding                                                                       | 18/28 genes, 64.3% | 1519/3499 genes, 43.4%   | 2.07E-02       |
| Structure-specific DNA binding                                                                        | 3/28 genes, 10.7%  | 78/3499 genes, 2.2%      | 2.34E-02       |
| Purine ribonucleoside triphosphate binding                                                            | 10/28 genes, 35.7% | 651/3499 genes, 18.6%    | 2.42E-02       |
| Purine ribonucleoside binding                                                                         | 10/28 genes, 35.7% | 652/3499 genes, 18.6%    | 2.44E-02       |
| Purine nucleoside binding                                                                             | 10/28 genes, 35.7% | 653/3499 genes, 18.7%    | 2.47E-02       |
| Ribonucleoside binding                                                                                | 10/28 genes, 35.7% | 654/3499 genes, 18.7%    | 2.49E-02       |
| Purine ribonucleotide binding                                                                         | 10/28 genes, 35.7% | 654/3499 genes, 18.7%    | 2.49E-02       |
| Nucleoside binding                                                                                    | 10/28 genes, 35.7% | 657/3499 genes, 18.8%    | 2.57E-02       |
| Purine nucleotide binding                                                                             | 10/28 genes, 35.7% | 659/3499 genes, 18.8%    | 2.62E-02       |
| Ribonucleotide binding                                                                                | 10/28 genes, 35.7% | 659/3499 genes, 18.8%    | 2.62E-02       |
| RNA binding                                                                                           | 8/28 genes, 28.6%  | 472/3499 genes, 13.5%    | 2.73E-02       |
| GTP binding                                                                                           | 4/28 genes, 14.3%  | 148/3499 genes, 4.2%     | 2.85E-02       |
| Guanyl nucleotide binding                                                                             | 4/28 genes, 14.3%  | 149/3499 genes, 4.3%     | 2.92E-02       |
| Guanyl ribonucleotide binding                                                                         | 4/28 genes, 14.3%  | 149/3499 genes, 4.3%     | 2.92E-02       |
| Nucleoside-triphosphatase activity                                                                    | 6/28 genes, 21.4%  | 323/3499 genes, 9.2%     | 3.89E-02       |
| ATPase activity                                                                                       | 4/28 genes, 14.3%  | 165/3499 genes, 4.7%     | 4.03E-02       |
| Oxidoreductase activity, acting on paired donors, with incorporation or reduction of molecular oxygen | 2/28 genes, 7.1%   | 41/3499 genes, 1.2%      | 4.18E-02       |
| Receptor binding                                                                                      | 5/28 genes, 17.9%  | 245/3499 genes, 7.0%     | 4.21E-02       |
| Pyrophosphatase activity                                                                              | 6/28 genes, 21.4%  | 331/3499 genes, 9.5%     | 4.31E-02       |
| Hydrolase activity, acting on acid anhydrides                                                         | 6/28 genes, 21.4%  | 331/3499 genes, 9.5%     | 4.31E-02       |
| Hydrolase activity, acting on acid anhydrides, in phosphorus-containing                               | 6/28 genes, 21.4%  | 331/3499 genes, 9.5%     | 4.31E-02       |

anhydrides

|                               |                    |                        |          |
|-------------------------------|--------------------|------------------------|----------|
| ATP binding                   | 8/28 genes, 28.6%  | 517/3499 genes, 14.8%  | 4.43E-02 |
| Anion binding                 | 11/28 genes, 39.3% | 823/3499 genes, 23.5%  | 4.53E-02 |
| Single-stranded DNA binding   | 2/28 genes, 7.1%   | 43/3499 genes, 1.2%    | 4.56E-02 |
| Nucleic acid binding          | 11/28 genes, 39.3% | 824/3499 genes, 23.5%  | 4.56E-02 |
| Adenyl ribonucleotide binding | 8/28 genes, 28.6%  | 521/3499 genes, 14.9%  | 4.61E-02 |
| Adenyl nucleotide binding     | 8/28 genes, 28.6%  | 524/3499 genes, 15.0%  | 4.75E-02 |
| Protein binding               | 23/28 genes, 82.1% | 2312/3499 genes, 66.1% | 4.95E-02 |

**Supplementary Table S14.** Gene ontology enrichment between BSN group and Control group (process ontology) ( $P < 0.05$ ).

| Gene ontology term                                   | Cluster frequency  | Protein frequency of use | <i>P</i> value |
|------------------------------------------------------|--------------------|--------------------------|----------------|
| Chaperone-mediated protein complex assembly          | 2/29 genes, 6.9%   | 5/3521 genes, 0.1%       | 6.45E-04       |
| System development                                   | 13/29 genes, 44.8% | 647/3521 genes, 18.4%    | 9.05E-04       |
| Ribonucleoside triphosphate catabolic process        | 6/29 genes, 20.7%  | 163/3521 genes, 4.6%     | 1.75E-03       |
| Purine ribonucleoside triphosphate catabolic process | 6/29 genes, 20.7%  | 163/3521 genes, 4.6%     | 1.75E-03       |
| DNA recombination                                    | 4/29 genes, 13.8%  | 65/3521 genes, 1.8%      | 1.78E-03       |
| Purine nucleoside triphosphate catabolic process     | 6/29 genes, 20.7%  | 164/3521 genes, 4.7%     | 1.81E-03       |
| Nucleoside triphosphate catabolic process            | 6/29 genes, 20.7%  | 165/3521 genes, 4.7%     | 1.87E-03       |
| Purine ribonucleotide catabolic process              | 6/29 genes, 20.7%  | 166/3521 genes, 4.7%     | 1.93E-03       |
| Ribonucleotide catabolic process                     | 6/29 genes, 20.7%  | 166/3521 genes, 4.7%     | 1.93E-03       |
| Purine nucleoside catabolic process                  | 6/29 genes, 20.7%  | 167/3521 genes, 4.7%     | 1.99E-03       |
| Purine ribonucleoside catabolic process              | 6/29 genes, 20.7%  | 167/3521 genes, 4.7%     | 1.99E-03       |
| ATP catabolic process                                | 4/29 genes, 13.8%  | 68/3521 genes, 1.9%      | 2.10E-03       |
| Ribonucleoside catabolic process                     | 6/29 genes, 20.7%  | 169/3521 genes, 4.8%     | 2.11E-03       |
| Nucleoside catabolic process                         | 6/29 genes, 20.7%  | 174/3521 genes, 4.9%     | 2.45E-03       |
| Multicellular organismal process                     | 16/29 genes, 55.2% | 1013/3521 genes, 28.8%   | 2.47E-03       |
| Purine nucleotide catabolic process                  | 6/29 genes, 20.7%  | 175/3521 genes, 5.0%     | 2.52E-03       |
| Purine-containing compound catabolic process         | 6/29 genes, 20.7%  | 176/3521 genes, 5.0%     | 2.60E-03       |
| Glycosyl compound catabolic process                  | 6/29 genes, 20.7%  | 177/3521 genes, 5.0%     | 2.67E-03       |
| Nucleotide catabolic process                         | 6/29 genes, 20.7%  | 180/3521 genes, 5.1%     | 2.91E-03       |
| Regulation of intracellular transport                | 4/29 genes, 13.8%  | 76/3521 genes, 2.2%      | 3.16E-03       |
| Nucleoside phosphate catabolic process               | 6/29 genes, 20.7%  | 183/3521 genes, 5.2%     | 3.16E-03       |

|                                                        |                    |                       |          |
|--------------------------------------------------------|--------------------|-----------------------|----------|
| Purine ribonucleoside triphosphate metabolic process   | 6/29 genes, 20.7%  | 186/3521 genes, 5.3%  | 3.43E-03 |
| Purine nucleoside triphosphate metabolic process       | 6/29 genes, 20.7%  | 189/3521 genes, 5.4%  | 3.72E-03 |
| Ribonucleoside triphosphate metabolic process          | 6/29 genes, 20.7%  | 189/3521 genes, 5.4%  | 3.72E-03 |
| Organophosphate catabolic process                      | 6/29 genes, 20.7%  | 190/3521 genes, 5.4%  | 3.82E-03 |
| Nucleobase-containing compound catabolic process       | 8/29 genes, 27.6%  | 330/3521 genes, 9.4%  | 4.04E-03 |
| Multicellular organismal development                   | 13/29 genes, 44.8% | 764/3521 genes, 21.7% | 4.42E-03 |
| Nucleoside triphosphate metabolic process              | 6/29 genes, 20.7%  | 196/3521 genes, 5.6%  | 4.46E-03 |
| Anatomical structure development                       | 13/29 genes, 44.8% | 769/3521 genes, 21.8% | 4.70E-03 |
| Nucleotide-excision repair, DNA gap filling            | 2/29 genes, 6.9%   | 13/3521 genes, 0.4%   | 4.83E-03 |
| Single-multicellular organism process                  | 15/29 genes, 51.7% | 972/3521 genes, 27.6% | 4.91E-03 |
| Carbohydrate derivative catabolic process              | 6/29 genes, 20.7%  | 201/3521 genes, 5.7%  | 5.05E-03 |
| Heterocycle catabolic process                          | 8/29 genes, 27.6%  | 343/3521 genes, 9.7%  | 5.13E-03 |
| Aromatic compound catabolic process                    | 8/29 genes, 27.6%  | 344/3521 genes, 9.8%  | 5.23E-03 |
| Cellular nitrogen compound catabolic process           | 8/29 genes, 27.6%  | 344/3521 genes, 9.8%  | 5.23E-03 |
| ATP metabolic process                                  | 4/29 genes, 13.8%  | 88/3521 genes, 2.5%   | 5.37E-03 |
| 'De novo' protein folding                              | 3/29 genes, 10.3%  | 45/3521 genes, 1.3%   | 5.65E-03 |
| Organic cyclic compound catabolic process              | 8/29 genes, 27.6%  | 352/3521 genes, 10.0% | 6.01E-03 |
| Purine ribonucleotide metabolic process                | 6/29 genes, 20.7%  | 214/3521 genes, 6.1%  | 6.86E-03 |
| Purine ribonucleoside metabolic process                | 6/29 genes, 20.7%  | 214/3521 genes, 6.1%  | 6.86E-03 |
| Purine nucleoside metabolic process                    | 6/29 genes, 20.7%  | 215/3521 genes, 6.1%  | 7.01E-03 |
| Telomere maintenance via semi-conservative replication | 2/29 genes, 6.9%   | 16/3521 genes, 0.5%   | 7.32E-03 |
| Regulation of intracellular protein transport          | 3/29 genes, 10.3%  | 50/3521 genes, 1.4%   | 7.59E-03 |
| Catabolic process                                      | 12/29 genes, 41.4% | 716/3521 genes, 20.3% | 7.72E-03 |



|                                                   |                    |                        |          |
|---------------------------------------------------|--------------------|------------------------|----------|
| Regulation of nucleocytoplasmic transport         | 3/29 genes, 10.3%  | 51/3521 genes, 1.4%    | 8.02E-03 |
| Ribonucleotide metabolic process                  | 6/29 genes, 20.7%  | 222/3521 genes, 6.3%   | 8.18E-03 |
| Telomere maintenance via recombination            | 2/29 genes, 6.9%   | 17/3521 genes, 0.5%    | 8.25E-03 |
| Cellular catabolic process                        | 11/29 genes, 37.9% | 634/3521 genes, 18.0%  | 8.84E-03 |
| Ribonucleoside metabolic process                  | 6/29 genes, 20.7%  | 226/3521 genes, 6.4%   | 8.91E-03 |
| Ribose phosphate metabolic process                | 6/29 genes, 20.7%  | 226/3521 genes, 6.4%   | 8.91E-03 |
| Purine nucleotide metabolic process               | 6/29 genes, 20.7%  | 227/3521 genes, 6.4%   | 9.10E-03 |
| Mitotic recombination                             | 2/29 genes, 6.9%   | 19/3521 genes, 0.5%    | 1.03E-02 |
| Cholesterol biosynthetic process                  | 2/29 genes, 6.9%   | 19/3521 genes, 0.5%    | 1.03E-02 |
| Nucleoside metabolic process                      | 6/29 genes, 20.7%  | 237/3521 genes, 6.7%   | 1.12E-02 |
| Purine-containing compound metabolic process      | 6/29 genes, 20.7%  | 241/3521 genes, 6.8%   | 1.21E-02 |
| Telomere maintenance via telomere lengthening     | 2/29 genes, 6.9%   | 21/3521 genes, 0.6%    | 1.25E-02 |
| Glycosyl compound metabolic process               | 6/29 genes, 20.7%  | 243/3521 genes, 6.9%   | 1.25E-02 |
| Cellular component organization                   | 16/29 genes, 55.2% | 1178/3521 genes, 33.5% | 1.28E-02 |
| Developmental process                             | 13/29 genes, 44.8% | 863/3521 genes, 24.5%  | 1.30E-02 |
| Virus-host interaction                            | 5/29 genes, 17.2%  | 176/3521 genes, 5.0%   | 1.32E-02 |
| Lymphocyte mediated immunity                      | 2/29 genes, 6.9%   | 22/3521 genes, 0.6%    | 1.37E-02 |
| Sterol biosynthetic process                       | 2/29 genes, 6.9%   | 22/3521 genes, 0.6%    | 1.37E-02 |
| Response to unfolded protein                      | 3/29 genes, 10.3%  | 62/3521 genes, 1.8%    | 1.37E-02 |
| Cellular macromolecular complex assembly          | 5/29 genes, 17.2%  | 181/3521 genes, 5.1%   | 1.47E-02 |
| Organophosphate metabolic process                 | 8/29 genes, 27.6%  | 410/3521 genes, 11.6%  | 1.48E-02 |
| Organic substance catabolic process               | 11/29 genes, 37.9% | 683/3521 genes, 19.4%  | 1.54E-02 |
| Response to topologically incorrect protein       | 3/29 genes, 10.3%  | 65/3521 genes, 1.8%    | 1.56E-02 |
| DNA strand elongation involved in DNA replication | 2/29 genes, 6.9%   | 24/3521 genes, 0.7%    | 1.62E-02 |
| DNA strand elongation                             | 2/29 genes, 6.9%   | 24/3521 genes, 0.7%    | 1.62E-02 |
| Interaction with host                             | 5/29 genes, 17.2%  | 189/3521 genes, 5.4%   | 1.75E-02 |
| Translational elongation                          | 3/29 genes, 10.3%  | 68/3521 genes, 1.9%    | 1.76E-02 |

|                                                      |                    |                        |          |
|------------------------------------------------------|--------------------|------------------------|----------|
| Symbiosis, encompassing mutualism through parasitism | 5/29 genes, 17.2%  | 192/3521 genes, 5.5%   | 1.86E-02 |
| Interspecies interaction between organisms           | 5/29 genes, 17.2%  | 192/3521 genes, 5.5%   | 1.86E-02 |
| Transcription-coupled nucleotide-excision repair     | 2/29 genes, 6.9%   | 26/3521 genes, 0.7%    | 1.88E-02 |
| Chaperone-mediated protein folding                   | 2/29 genes, 6.9%   | 26/3521 genes, 0.7%    | 1.88E-02 |
| Protein folding                                      | 4/29 genes, 13.8%  | 127/3521 genes, 3.6%   | 1.91E-02 |
| Macromolecular complex assembly                      | 7/29 genes, 24.1%  | 348/3521 genes, 9.9%   | 1.99E-02 |
| Organic cyclic compound metabolic process            | 16/29 genes, 55.2% | 1231/3521 genes, 35.0% | 2.00E-02 |
| Organonitrogen compound catabolic process            | 6/29 genes, 20.7%  | 271/3521 genes, 7.7%   | 2.07E-02 |
| Reproduction                                         | 8/29 genes, 27.6%  | 436/3521 genes, 12.4%  | 2.10E-02 |
| Regulation of protein transport                      | 3/29 genes, 10.3%  | 73/3521 genes, 2.1%    | 2.12E-02 |
| Cellular component organization or biogenesis        | 16/29 genes, 55.2% | 1248/3521 genes, 35.4% | 2.29E-02 |
| Cellular component assembly                          | 8/29 genes, 27.6%  | 443/3521 genes, 12.6%  | 2.29E-02 |
| Leukocyte mediated immunity                          | 2/29 genes, 6.9%   | 29/3521 genes, 0.8%    | 2.32E-02 |
| Protein-DNA complex assembly                         | 2/29 genes, 6.9%   | 29/3521 genes, 0.8%    | 2.32E-02 |
| Response to stress                                   | 11/29 genes, 37.9% | 724/3521 genes, 20.6%  | 2.35E-02 |
| Translation                                          | 5/29 genes, 17.2%  | 204/3521 genes, 5.8%   | 2.36E-02 |
| Response to chemical stimulus                        | 11/29 genes, 37.9% | 725/3521 genes, 20.6%  | 2.37E-02 |
| Cellular component biogenesis                        | 9/29 genes, 31.0%  | 536/3521 genes, 15.2%  | 2.39E-02 |
| Telomere maintenance                                 | 2/29 genes, 6.9%   | 31/3521 genes, 0.9%    | 2.63E-02 |
| Telomere organization                                | 2/29 genes, 6.9%   | 31/3521 genes, 0.9%    | 2.63E-02 |
| Regulation of microtubule-based process              | 2/29 genes, 6.9%   | 31/3521 genes, 0.9%    | 2.63E-02 |
| Cellular protein complex assembly                    | 3/29 genes, 10.3%  | 80/3521 genes, 2.3%    | 2.70E-02 |
| Macromolecular complex subunit organization          | 8/29 genes, 27.6%  | 459/3521 genes, 13.0%  | 2.78E-02 |
| S phase of mitotic cell cycle                        | 3/29 genes, 10.3%  | 81/3521 genes, 2.3%    | 2.79E-02 |
| S phase                                              | 3/29 genes, 10.3%  | 82/3521 genes, 2.3%    | 2.88E-02 |
| Homeostasis of number of cells                       | 2/29 genes, 6.9%   | 33/3521 genes, 0.9%    | 2.95E-02 |
| Regulation of establishment of protein localization  | 3/29 genes, 10.3%  | 84/3521 genes, 2.4%    | 3.06E-02 |

|                                                  |                    |                        |          |
|--------------------------------------------------|--------------------|------------------------|----------|
| M phase                                          | 4/29 genes, 13.8%  | 147/3521 genes, 4.2%   | 3.07E-02 |
| Nucleotide-excision repair                       | 2/29 genes, 6.9%   | 34/3521 genes, 1.0%    | 3.12E-02 |
| Meiosis                                          | 2/29 genes, 6.9%   | 34/3521 genes, 1.0%    | 3.12E-02 |
| Alcohol biosynthetic process                     | 2/29 genes, 6.9%   | 34/3521 genes, 1.0%    | 3.12E-02 |
| M phase of meiotic cell cycle                    | 2/29 genes, 6.9%   | 34/3521 genes, 1.0%    | 3.12E-02 |
| Immune system development                        | 3/29 genes, 10.3%  | 85/3521 genes, 2.4%    | 3.16E-02 |
| Viral reproduction                               | 6/29 genes, 20.7%  | 300/3521 genes, 8.5%   | 3.23E-02 |
| Multi-organism cellular process                  | 6/29 genes, 20.7%  | 301/3521 genes, 8.5%   | 3.28E-02 |
| Steroid biosynthetic process                     | 2/29 genes, 6.9%   | 35/3521 genes, 1.0%    | 3.30E-02 |
| Cholesterol metabolic process                    | 2/29 genes, 6.9%   | 35/3521 genes, 1.0%    | 3.30E-02 |
| Axon guidance                                    | 3/29 genes, 10.3%  | 88/3521 genes, 2.5%    | 3.45E-02 |
| Regulation of protein import into nucleus        | 2/29 genes, 6.9%   | 36/3521 genes, 1.0%    | 3.47E-02 |
| Regulation of protein localization to nucleus    | 2/29 genes, 6.9%   | 36/3521 genes, 1.0%    | 3.47E-02 |
| Nucleotide metabolic process                     | 6/29 genes, 20.7%  | 307/3521 genes, 8.7%   | 3.57E-02 |
| Carbohydrate derivative metabolic process        | 7/29 genes, 24.1%  | 392/3521 genes, 11.1%  | 3.58E-02 |
| Nucleoside phosphate metabolic process           | 6/29 genes, 20.7%  | 308/3521 genes, 8.7%   | 3.62E-02 |
| Meiotic cell cycle                               | 2/29 genes, 6.9%   | 37/3521 genes, 1.1%    | 3.65E-02 |
| Organic hydroxy compound biosynthetic process    | 2/29 genes, 6.9%   | 37/3521 genes, 1.1%    | 3.65E-02 |
| Viral reproductive process                       | 5/29 genes, 17.2%  | 230/3521 genes, 6.5%   | 3.73E-02 |
| Sterol metabolic process                         | 2/29 genes, 6.9%   | 38/3521 genes, 1.1%    | 3.83E-02 |
| Protein-DNA complex subunit organization         | 2/29 genes, 6.9%   | 38/3521 genes, 1.1%    | 3.83E-02 |
| DNA-dependent DNA replication                    | 2/29 genes, 6.9%   | 39/3521 genes, 1.1%    | 4.02E-02 |
| G1/S transition of mitotic cell cycle            | 2/29 genes, 6.9%   | 40/3521 genes, 1.1%    | 4.21E-02 |
| Regulation of homeostatic process                | 2/29 genes, 6.9%   | 40/3521 genes, 1.1%    | 4.21E-02 |
| 'De novo' posttranslational protein folding      | 2/29 genes, 6.9%   | 40/3521 genes, 1.1%    | 4.21E-02 |
| Regulation of protein localization               | 3/29 genes, 10.3%  | 98/3521 genes, 2.8%    | 4.53E-02 |
| Regulation of cellular localization              | 4/29 genes, 13.8%  | 168/3521 genes, 4.8%   | 4.68E-02 |
| Nucleobase-containing compound metabolic process | 14/29 genes, 48.3% | 1122/3521 genes, 31.9% | 4.73E-02 |
| Cell cycle phase                                 | 5/29 genes, 17.2%  | 247/3521 genes, 7.0%   | 4.84E-02 |

|                                                        |                   |                      |          |
|--------------------------------------------------------|-------------------|----------------------|----------|
| Nucleobase-containing small molecule metabolic process | 6/29 genes, 20.7% | 332/3521 genes, 9.4% | 4.96E-02 |
| Protein complex assembly                               | 5/29 genes, 17.2% | 249/3521 genes, 7.1% | 4.98E-02 |

**Supplementary Table S15.** Kyoto encyclopedia of genes and genomes enrichment between E@TSN group and Control group ( $P < 0.05$ ).

| Pathway ID | Pathway                                     | Diff Proteins with pathway annotation (170) | All Proteins with pathway annotation (3333) | <i>P</i> value |
|------------|---------------------------------------------|---------------------------------------------|---------------------------------------------|----------------|
| ko04612    | Antigen processing and presentation         | 7 (4.12%)                                   | 27 (0.81%)                                  | 3.00E-04       |
| ko03013    | RNA transport                               | 15 (8.82%)                                  | 130 (3.9%)                                  | 2.17E-03       |
| ko03010    | Ribosome                                    | 8 (4.71%)                                   | 58 (1.74%)                                  | 8.36E-03       |
| ko04141    | Protein processing in endoplasmic reticulum | 12 (7.06%)                                  | 117 (3.51%)                                 | 1.49E-02       |
| ko00010    | Glycolysis / Gluconeogenesis                | 6 (3.53%)                                   | 42 (1.26%)                                  | 1.83E-02       |
| ko05322    | Systemic lupus erythematosus                | 4 (2.35%)                                   | 21 (0.63%)                                  | 1.98E-02       |
| ko03040    | Spliceosome                                 | 12 (7.06%)                                  | 127 (3.81%)                                 | 2.68E-02       |
| ko03030    | DNA replication                             | 4 (2.35%)                                   | 25 (0.75%)                                  | 3.57E-02       |
| ko03450    | Non-homologous end-joining                  | 2 (1.18%)                                   | 7 (0.21%)                                   | 4.59E-02       |

**Supplementary Table S16.** Kyoto encyclopedia of genes and genomes enrichment between EA group and Control group ( $P < 0.05$ ).

| Pathway ID | Pathway                                     | Diff Proteins with pathway annotation (115) | All Proteins with pathway annotation (3333) | <i>P</i> value |
|------------|---------------------------------------------|---------------------------------------------|---------------------------------------------|----------------|
| ko00010    | Glycolysis / Gluconeogenesis                | 11 (9.57%)                                  | 42 (1.26%)                                  | 8.88E-08       |
| ko03030    | DNA replication                             | 5 (4.35%)                                   | 25 (0.75%)                                  | 1.37E-03       |
| ko04612    | Antigen processing and presentation         | 5 (4.35%)                                   | 27 (0.81%)                                  | 1.97E-03       |
| ko00051    | Fructose and mannose metabolism             | 4 (3.48%)                                   | 21 (0.63%)                                  | 5.11E-03       |
| ko04141    | Protein processing in endoplasmic reticulum | 10 (8.7%)                                   | 117 (3.51%)                                 | 6.42E-03       |
| ko00030    | Pentose phosphate pathway                   | 4 (3.48%)                                   | 25 (0.75%)                                  | 9.71E-03       |
| ko04940    | Type I diabetes mellitus                    | 2 (1.74%)                                   | 5 (0.15%)                                   | 1.10E-02       |
| ko00750    | Vitamin B6 metabolism                       | 2 (1.74%)                                   | 5 (0.15%)                                   | 1.10E-02       |
| ko00020    | Citrate cycle (TCA cycle)                   | 4 (3.48%)                                   | 28 (0.84%)                                  | 1.45E-02       |
| ko05150    | Staphylococcus aureus infection             | 2 (1.74%)                                   | 6 (0.18%)                                   | 1.62E-02       |
| ko05020    | Prion diseases                              | 3 (2.61%)                                   | 20 (0.6%)                                   | 2.97E-02       |
| ko05322    | Systemic lupus erythematosus                | 3 (2.61%)                                   | 21 (0.63%)                                  | 3.38E-02       |

**Supplementary Table S17.** Kyoto encyclopedia of genes and genomes enrichment between BSN group and Control group ( $P < 0.05$ ).

| Pathway ID | Pathway                             | Diff Proteins with pathway (29) | All Proteins with pathway annotation (3333) | $P$ value |
|------------|-------------------------------------|---------------------------------|---------------------------------------------|-----------|
| ko05134    | Legionellosis                       | 3 (10.34%)                      | 34 (1.02%)                                  | 2.96E-03  |
| ko03430    | Mismatch repair                     | 2 (6.9%)                        | 18 (0.54%)                                  | 1.03E-02  |
| ko05020    | Prion diseases                      | 2 (6.9%)                        | 20 (0.6%)                                   | 1.26E-02  |
| ko03030    | DNA replication                     | 2 (6.9%)                        | 25 (0.75%)                                  | 1.94E-02  |
| ko03420    | Nucleotide excision repair          | 2 (6.9%)                        | 26 (0.78%)                                  | 2.09E-02  |
| ko04612    | Antigen processing and presentation | 2 (6.9%)                        | 27 (0.81%)                                  | 2.24E-02  |
| ko04940    | Type I diabetes mellitus            | 1 (3.45%)                       | 5 (0.15%)                                   | 4.28E-02  |

**Supplementary Table S18.** Blood index of mice in Control group, BSN group, EA group and E@TSN group.

| Blood index                         | Unit                | Control group | BSN group | EA group | E@TSN group | Reference value |
|-------------------------------------|---------------------|---------------|-----------|----------|-------------|-----------------|
| Erythrocytes                        | 10 <sup>12</sup> /L | 8.54          | 8.64      | 8.52     | 10.30       | 10.30           |
| Leukocytes                          | 10 <sup>9</sup> /L  | 4.86          | 4.51      | 4.08     | 4.64        | 4.87            |
| Platelet                            | 10 <sup>9</sup> /L  | 468.00        | 786.00    | 800.00   | 800.00      | 693.40          |
| Hemoglobin                          | g/L                 | 129.00        | 123.00    | 149.00   | 158.00      | 160.70          |
| Hematocrit                          | %                   | 36.90         | 35.20     | 45.90    | 43.30       | 49.00           |
| Corpuscular volume                  | fL                  | 43.20         | 42.40     | 48.80    | 42.00       | 44.55           |
| Corpuscularhemoglobin               | pg                  | 15.10         | 13.60     | 13.20    | 15.30       | 15.61           |
| Corpuscularhemoglobin concentration | g/L                 | 350.00        | 345.00    | 371.00   | 365.00      | 328.20          |
| Red Cell volume distribution width  | %                   | 24.90         | 23.70     | 24.10    | 25.40       | 34.58           |



**Supplementary Table S19.** Biochemical indicator of mice in Control group, BSN group, EA group and E@TSN group.

| Biochemical indicator | Unit | Control group | BSN group | EA group | E@TSN group | Reference value |
|-----------------------|------|---------------|-----------|----------|-------------|-----------------|
| Total protein         | g/L  | 78.80         | 51.75     | 56.00    | 60.10       | 47.30           |
| Triglycerides         | mM   | 0.88          | 0.43      | 0.68     | 0.73        | 0.73            |
| Blood urea nitrogen   | mM   | 9.82          | 11.37     | 7.50     | 9.00        | 7.79            |
| Albumin               | g/L  | 31.10         | 24.85     | 25.50    | 26.40       | 32.90           |
| Glucose               | mM   | 3.67          | 3.28      | 5.19     | 4.28        | 3.58            |

## Supplementary Methods

**Solubility and oil-water partition coefficient assay.** Apparent solubility was determined by adding excess EA and E@TSN to 5 mL of water or n-octanol in sealed glass containers at 25 °C. Each experiment was performed in triplicate. The liquids were agitated for 24 h, and then centrifuged to remove excess EA at 4,000 rpm for 10 min (TGL-16B Centrifuge, Anting Scientific Instrument, Shanghai, China). The supernatant was filtrated through a 0.45 µm membrane. The EA Concentration was analyzed by measuring the absorbance at 225 nm with an ultraviolet spectrometer. The standard regression equations for EA quantification was listed as follows:  $A = 0.1775 C + 0.0411$ ,  $r = 0.9995$  ( $n = 3$ ), where  $A$  referred to the absorption of EA,  $C$  referred to the EA concentration,  $r$  referred to the correlation coefficient. The linearity range was 1.00-4.00 µg/mL. Apparent oil/water partition coefficient ( $\log P$ ) studies were carried out using a shake flask method. Samples containing 5 mg EA were added to 10 mL of distilled water in sealed glass containers. The solutions were placed on a THZ-82A shaker (Ronghua Instrument Manufacturing Co., China) with a stirring at 100 rpm for 24 h at 37 °C. Following stirring, 10 mL of n-octanol was added to each solution and the mixture was agitated for another 24 h. The n-octanol and water phases were separated by centrifuging at 4000 rpm for 15 min, and filtrated through a 0.45 µm membrane. Finally, the EA concentrations were determined using a HPLC method. Each experiment was performed in triplicate.  $\log P$  values of EA and E@TSN were calculated as follows:  $\log P = C_o/C_w$ , where  $C_o$  was the EA concentration in n-octanol,  $C_w$  was the EA concentration in water.

**Optimal Preparation.** E@TSN was successfully prepared through a solvent evaporation method. The optimal formula was obtained by a three-factor and five-level central composite design method (**Table S1**). The complex rate (CR) (between 27.82% and 85.80 %) of 20 batches changed significantly (**Table S2**). The fitting models are listed as follows:

$$y = 97.612 - 17.411X_1 + 2.589X_2 + 1.538X_3$$
$$(R^2 = 0.809, F = 27.869, P < 0.001) \quad (1)$$

$$y = 136.883 - 29.087X_1 - 10.239X_2 - 17.1$$
$$+ 1.829X_1X_3 + 5.687X_2X_3 \quad (2)$$

$$(R^2 = 0.764, F = 7.831, P = 0.002)$$

$X_1$ ,  $X_2$  and  $X_3$  refer to EA (mol), PL/EA (mol/mol) and HCD/PL (mol/mol) respectively. As shown, linear model (Equation 1) of the experimental data is apparently superior to the quadratic model fitting (Equation 2) with respect to the correlation coefficient ( $R^2$ ). According to Equation 1, when the reaction solvent (10 mL anhydrous ethanol), reaction time ( $t = 5$  h) and the reaction temperature ( $T = 60^\circ\text{C}$ ) were fixed, our results suggested that to develop a cost-effective E@TSN with high complexation rate, optimal values for  $X_1$  (mol),  $X_2$  (mol/mol) and  $X_3$  (mol/mol) should be 1.85, 2.47, and 2.07, respectively. The CR of E@TSN prepared under the optimal protocol described was recorded as  $85.80 \pm 0.63$  %. The predicted values and the experimental results of E@TSN prepared under the optimal protocol were consistent ( $P > 0.05$ ) (**Table S2**).
